# Supplementary material for: Age-dependent differences in iris colouration of passerines during autumn migration in Central Europe
Source: PeerJ. 2020 Jun 8;8:e9188. doi: 10.7717/peerj.9188 (PMC7289142; doi:10.7717/peerj.9188)
Supplement: Supplemental Information 1 [file peerj-08-9188-s001.xlsx]

## Sheet: iris_data
date	spec	ring-id	sex	age	wing	mass	bmi	colour	iris_ident	iris_ident_all	non-compliant	seq
2019-10-19	Turdus merula	HJ16619	f	2+	129	75.9	0.588372	2	0	0		1
2019-10-21	Turdus merula	HJ16642	f	1	124	94.9	0.765323	1	0	0		1
2019-10-21	Certhia familiaris	LK46189		1	66	9.3	0.140909	1	0	0		1
2019-10-21	Certhia familiaris	LK46204		1	60	8.4	0.14	1	0	0		1
2019-10-22	Turdus merula	HJ16652	f	2+	130	93.7	0.720769	2	0	0		1
2019-10-22	Turdus merula	HJ16653	m	2+	130	81.3	0.625385	2	0	0		1
2019-10-22	Turdus merula	HJ16654	m	1	131	88.6	0.676336	1	0	0		1
2019-10-22	Turdus merula	HJ16655	m	2+	134	94.9	0.708209	2	0	0		1
2019-10-22	Turdus merula	HJ16656	f	1	124	82	0.66129	1	0	0		1
2019-10-22	Turdus merula	HJ16657	m	2+	132	91.4	0.692424	2	0	0		1
2019-10-22	Turdus merula	HJ16658	f	1	125	100.2	0.8016	2	1	1	1	1
2019-10-22	Turdus merula	HJ16660	f	2+	131	110.4	0.842748	3	1	1		1
2019-10-22	Turdus merula	HJ16661	f	1	126	97.2	0.771429	1	0	0		1
2019-10-22	Turdus merula	HJ16664	f	2+	127	87.2	0.686614	2	0	0		1
2019-10-22	Turdus merula	HJ16665	f	1	123	97.2	0.790244	1	0	0		1
2019-10-22	Turdus merula	HJ16666	f	1	131	80	0.610687	1	0	0		1
2019-10-22	Turdus merula	HJ16667	m	2+	130	91.9	0.706923	2	0	0		1
2019-10-22	Turdus merula	HJ16668	m	1	130	111.3	0.856154	1	0	0		1
2019-10-22	Turdus merula	HJ16669	f	1	129	100.5	0.77907	1	0	0		1
2019-10-22	Turdus merula	HJ16670	m	1	129	98	0.75969	1	0	0		1
2019-10-22	Erithacus rubecula	K9Z1555	f	2+	71			2		0		1
2019-10-22	Erithacus rubecula	K9Z1618		1	72	14.3	0.198611	1	0	0		1
2019-10-22	Erithacus rubecula	K9Z1627	f	2+	71	15.4	0.216901	2	0	0		1
2019-10-22	Erithacus rubecula	K9Z1645		2+	73	17.8	0.243836	2	0	0		1
2019-10-22	Erithacus rubecula	K9Z1646		1	73	14.6	0.2	1	0	0		1
2019-10-22	Erithacus rubecula	K9Z1647	f	1	70	15.2	0.217143	1	0	0		1
2019-10-22	Erithacus rubecula	K9Z1648		1	73	17	0.232877	1	0	0		1
2019-10-22	Parus major	K9Z1650	m	1	76	19.2	0.252632	1	0	0		1
2019-10-22	Parus major	K9Z1651	f	2+		15.4		2		0		1
2019-10-22	Parus major	K9Z1652	f	2+	76	16.3	0.214474	2	0	0		1
2019-10-22	Parus major	K9Z1653	m	1	77	16.4	0.212987	1	0	0		1
2019-10-22	Parus major	K9Z1676	f	2+	74	16.1	0.217568	2	0	0		1
2019-10-22	Parus major	K9Z1677	f	2+		16.6		2		0		1
2019-10-22	Parus major	K9Z1678	f	2+	73	16.4	0.224658	2	0	0		1
2019-10-22	Parus major	K9Z1679	m	1		17.1		1		0		1
2019-10-22	Erithacus rubecula	K9Z1682		2+	72	15.9	0.220833	2	0	0		1
2019-10-22	Erithacus rubecula	K9Z1683		1		15.9		1		0		1
2019-10-22	Cyanistes caeruleus	K9Z1685	f	1	65	10	0.153846	1	0	0		1
2019-10-22	Erithacus rubecula	K9Z1687		1	73	14.1	0.193151	1	0	0		1
2019-10-22	Erithacus rubecula	K9Z1688		1	72	16.6	0.230556	1	0	0		1
2019-10-22	Erithacus rubecula	K9Z1689	m	1	75	16.1	0.214667	1	0	0		1
2019-10-22	Erithacus rubecula	K9Z1690	f	1	69	15.8	0.228986	1	0	0		1
2019-10-22	Erithacus rubecula	K9Z1691		1	71	15.2	0.214085	1	0	0		1
2019-10-22	Parus major	K9Z1692	m	2+	79	18.8	0.237975	2	0	0		1
2019-10-22	Parus major	K9Z1693	f	2+	76	17.3	0.227632	2	0	0		1
2019-10-22	Erithacus rubecula	K9Z1695		1	72	14.6	0.202778	1	0	0		1
2019-10-22	Erithacus rubecula	K9Z1696	m	1	75	16.4	0.218667	1	0	0		1
2019-10-22	Erithacus rubecula	K9Z1698		1	71	14.5	0.204225	1	0	0		1
2019-10-22	Erithacus rubecula	K9Z1699	f	2+	71	14.3	0.201408	3	1	1		1
2019-10-22	Parus major	K9Z1700	f	1	75	16.8	0.224	1	0	0		1
2019-10-22	Erithacus rubecula	K9Z1701		1	74	16.2	0.218919	1	0	0		1
2019-10-22	Parus major	K9Z1702	f	1	75	17.8	0.237333	1	0	0		1
2019-10-22	Parus major	K9Z1703	m	1	75	18.8	0.250667	1	0	0		1
2019-10-22	Erithacus rubecula	K9Z1706		1	72	18.1	0.251389	1	0	0		1
2019-10-22	Certhia familiaris	LK 46254		1	63	8.4	0.133333	1	0	0		1
2019-10-22	Regulus regulus	LK46285	m	1	56	5.2	0.0928571	1	0	0		1
2019-10-22	Phylloscopus collybita	LK46286		2+	57	6.9	0.121053	2	0	0		1
2019-10-22	Phylloscopus collybita	LK46312		1	61	8.6	0.140984	1	0	0		1
2019-10-22	Aegithalos caudatus	LK46354		1		8.2		1		0		1
2019-10-22	Regulus regulus	LK46360	m	1	54	5.1	0.0944444	1	0	0		1
2019-10-22	Regulus regulus	LK46361	m	1	54	6.2	0.114815	3	1	1		1
2019-10-22	Regulus regulus	LK46362	f	1	50	6	0.12	1	0	0		1
2019-10-22	Troglodytes troglodytes	LK46363		1	48	91	1.89583	1	0	0		1
2019-10-22	Certhia familiaris	LK46366		1	64	8.7	0.135937	1	0	0		1
2019-10-22	Aegithalos caudatus	XH75724		1	65			1		0		1
2019-10-23	Turdus merula	HJ16515	m	1	129	97.6	0.756589	1	0	0		1
2019-10-23	Turdus merula	HJ16644	f	1	127	84.3	0.66378	1	0	0		1
2019-10-23	Turdus merula	HJ16659	m	1		92.9		1		0		1
2019-10-23	Turdus merula	HJ16662	f	1		93.9		1		0		1
2019-10-23	Turdus merula	HJ16671	f	1	130	84.8	0.652308	1	0	0		1
2019-10-23	Turdus merula	HJ16672	m	2+	134	92.1	0.687313	3	1	1		1
2019-10-23	Turdus merula	HJ16673	f	1	123	89.5	0.727642	3	1	1		1
2019-10-23	Turdus merula	HJ16674	f	1	129	90.2	0.699225	1	0	0		1
2019-10-23	Turdus merula	HJ16675	m	1	131	91.2	0.696183	1	0	0		1
2019-10-23	Turdus merula	HJ16676	f	1	128	93.1	0.727344	1	0	0		1
2019-10-23	Turdus merula	HJ16677	f	1		95.7		1		0		1
2019-10-23	Turdus merula	HJ16678	m	2+	134	104	0.776119	2	0	0		1
2019-10-23	Turdus merula	HJ16679	f	1	125	89.4	0.7152	1	0	0		1
2019-10-23	Turdus merula	HJ16680	m	1	126	86.7	0.688095	1	0	0		1
2019-10-23	Turdus merula	HJ16681	m	1	127	93	0.732283	1	0	0		1
2019-10-23	Turdus merula	HJ16682	f	2+	130	86.5	0.665385	3	1	1		1
2019-10-23	Turdus merula	HJ16683	f	1	127	105.4	0.829921	1	0	0		1
2019-10-23	Turdus merula	HJ16684	m	2+	136	102.1	0.750735	2	0	0		1
2019-10-23	Turdus merula	HJ16685	f	1		105		1		0		1
2019-10-23	Parus major	K7T7531	m	1	80			1		0		1
2019-10-23	Parus major	K9Z0783	m	1	75	17.8	0.237333	1	0	0		1
2019-10-23	Erithacus rubecula	K9Z1159		2+	73	16.9	0.231507	2	0	0		1
2019-10-23	Erithacus rubecula	K9Z1277		1		15.2		1		0		1
2019-10-23	Erithacus rubecula	K9Z1340		1		15.4		1		0		1
2019-10-23	Erithacus rubecula	K9Z1376		1		15.8		1		0		1
2019-10-23	Erithacus rubecula	K9Z1618		1		14.2		1		0		1
2019-10-23	Erithacus rubecula	K9Z1641	f	1	70	16.3	0.232857	1	0	0		1
2019-10-23	Erithacus rubecula	K9Z1681		1		15.5		1		0		1
2019-10-23	Erithacus rubecula	K9Z1708		2+	75	17.1	0.228	2	0	0		1
2019-10-23	Erithacus rubecula	K9Z1709	f	1	69	17	0.246377	1	0	0		1
2019-10-23	Erithacus rubecula	K9Z1710	f	2+	71	14.2	0.2	3	1	1		1
2019-10-23	Erithacus rubecula	K9Z1711		1	73	16	0.219178	1	0	0		1
2019-10-23	Erithacus rubecula	K9Z1712		1	71	16.5	0.232394	1	0	0		1
2019-10-23	Erithacus rubecula	K9Z1713	m	1	75	16	0.213333	1	0	0		1
2019-10-23	Erithacus rubecula	K9Z1714		1	73	15	0.205479	1	0	0		1
2019-10-23	Erithacus rubecula	K9Z1715		1	73	14.4	0.19726	1	0	0		1
2019-10-23	Erithacus rubecula	K9Z1716		1	73	17.1	0.234247	1	0	0		1
2019-10-23	Erithacus rubecula	K9Z1717		1	73	18	0.246575	1	0	0		1
2019-10-23	Erithacus rubecula	K9Z1718	f	1	70	16.2	0.231429	1	0	0		1
2019-10-23	Erithacus rubecula	K9Z1719		1	74	17.6	0.237838	1	0	0		1
2019-10-23	Erithacus rubecula	K9Z1721	m	1	75	17.1	0.228	1	0	0		1
2019-10-23	Erithacus rubecula	K9Z1722		1	72	16.3	0.226389	1	0	0		1
2019-10-23	Erithacus rubecula	K9Z1723		2+	74	19.6	0.264865	2	1	1	1	1
2019-10-23	Erithacus rubecula	K9Z1724		1	71	16.3	0.229577	1	0	0		1
2019-10-23	Erithacus rubecula	K9Z1725		1	73	18.2	0.249315	1	0	0		1
2019-10-23	Erithacus rubecula	K9Z1726		1	72	14.1	0.195833	1	0	0		1
2019-10-23	Parus major	K9Z1727	f	1	70	16.8	0.24	1	0	0		1
2019-10-23	Parus major	K9Z1728	f	1	73	16.7	0.228767	1	0	0		1
2019-10-23	Parus major	K9Z1729	m	1	76	18.1	0.238158	1	0	0		1
2019-10-23	Parus major	K9Z1730	f	2+	73	16	0.219178	2	0	0		1
2019-10-23	Parus major	K9Z1731	f	1		17		1		0		1
2019-10-23	Parus major	K9Z1732	m	1	80	17.9	0.22375	1	0	0		1
2019-10-23	Parus major	K9Z1733	m	1	75	16	0.213333	1	0	0		1
2019-10-23	Parus major	K9Z1734	m	1	76	18.2	0.239474	1	0	0		1
2019-10-23	Parus major	K9Z1735	m	1	76	17.3	0.227632	1	0	0		1
2019-10-23	Parus major	K9Z1736	f	1	73	17.3	0.236986	1	0	0		1
2019-10-23	Parus major	K9Z1737	m	1	76	17.2	0.226316	1	0	0		1
2019-10-23	Erithacus rubecula	K9Z1738	f	2+	72	15.5	0.215278	2	0	0		1
2019-10-23	Erithacus rubecula	K9Z1739		1		17.5		1		0		1
2019-10-23	Parus major	K9Z1740	f	1		15.9		1		0		1
2019-10-23	Parus major	K9Z1742	m	1	76	17.7	0.232895	3	1	1		1
2019-10-23	Parus major	K9Z1743	f	2+	76	16.7	0.219737	2	0	0		1
2019-10-23	Parus major	K9Z1744	f	2+	74	16.1	0.217568	2	0	0		1
2019-10-23	Parus major	K9Z1745	f	1	72	15.2	0.211111	1	0	0		1
2019-10-23	Parus major	K9Z1746	m	2+	80	18.5	0.23125	2	0	0		1
2019-10-23	Erithacus rubecula	K9Z1747	f	1	68	16.8	0.247059	1	0	0		1
2019-10-23	Erithacus rubecula	K9Z1748		1	71	18.7	0.26338	1	0	0		1
2019-10-23	Erithacus rubecula	K9Z1749	f	1	69	15.3	0.221739	1	0	0		1
2019-10-23	Parus major	K9Z1750	f	1	74	15.9	0.214865	1	0	0		1
2019-10-23	Parus major	K9Z1751	m	1	77	18.4	0.238961	1	0	0		1
2019-10-23	Parus major	K9Z1752	f	2+	74	16.2	0.218919	2	0	0		1
2019-10-23	Parus major	K9Z1753	m	2+	78	17.5	0.224359	2	0	0		1
2019-10-23	Cyanistes caeruleus	K9Z1754	m	1	66	10.8	0.163636	1	0	0		1
2019-10-23	Cyanistes caeruleus	K9Z1755	f	1	66	11.2	0.169697	1	0	0		1
2019-10-23	Erithacus rubecula	K9Z1756		1	74	18.3	0.247297	1	0	0		1
2019-10-23	Erithacus rubecula	K9Z1757		1	71	16.4	0.230986	1	0	0		1
2019-10-23	Cyanistes caeruleus	K9Z1758	m	1	65	11.2	0.172308	1	0	0		1
2019-10-23	Erithacus rubecula	K9Z1759	m	1	75	18.6	0.248	1	0	0		1
2019-10-23	Parus major	K9Z1760	m	1		18.1		1		0		1
2019-10-23	Parus major	K9Z1761	f	1	75	15.1	0.201333	1	0	0		1
2019-10-23	Cyanistes caeruleus	K9Z1762	f	1	62	10.1	0.162903	1	0	0		1
2019-10-23	Cyanistes caeruleus	K9Z1763	m	2+	68	11.3	0.166176	2	0	0		1
2019-10-23	Cyanistes caeruleus	K9Z1764	f	2+	63	10.4	0.165079	2	0	0		1
2019-10-23	Cyanistes caeruleus	K9Z1765	m	1	71	12.5	0.176056	1	0	0		1
2019-10-23	Erithacus rubecula	K9Z1766		1	74	16.8	0.227027	1	0	0		1
2019-10-23	Erithacus rubecula	K9Z1767		1	74	16.9	0.228378	1	0	0		1
2019-10-23	Erithacus rubecula	K9Z1768		1	74	17.6	0.237838	1	0	0		1
2019-10-23	Erithacus rubecula	K9Z1769	f	1	70	16.7	0.238571	1	0	0		1
2019-10-23	Erithacus rubecula	K9Z1770		1	72	18.1	0.251389	1	0	0		1
2019-10-23	Erithacus rubecula	K9Z1771		1	72	19.9	0.276389	1	0	0		1
2019-10-23	Aegithalos caudatus	LK 46449		1	65	8.6	0.132308	1	0	0		1
2019-10-23	Certhia familiaris	LK42789		1		8.9		1		0		1
2019-10-23	Troglodytes troglodytes	LK46367		1		9.7		1		0		1
2019-10-23	Regulus regulus	LK46369	f	1	52	5.2	0.1	1	0	0		1
2019-10-23	Regulus regulus	LK46370	f	1	52	5.6	0.107692	1	0	0		1
2019-10-23	Regulus regulus	LK46371	f	1	52	5.5	0.105769	1	0	0		1
2019-10-23	Regulus regulus	LK46372	f	1	52	5.7	0.109615	1	0	0		1
2019-10-23	Regulus regulus	LK46373	m	1	54	5.4	0.1	1	0	0		1
2019-10-23	Regulus regulus	LK46374	f	2+	50	4.8	0.096	2	0	0		1
2019-10-23	Phylloscopus collybita	LK46375		1	62	8.7	0.140323	1	0	0		1
2019-10-23	Regulus regulus	LK46376	f	1	52	5.5	0.105769	1	0	0		1
2019-10-23	Regulus regulus	LK46377	m	1	53	5.4	0.101887	1	0	0		1
2019-10-23	Regulus regulus	LK46378	m	1	52	5.6	0.107692	1	0	0		1
2019-10-23	Regulus regulus	LK46379	m	1	55	5.1	0.0927273	1	0	0		1
2019-10-23	Regulus regulus	LK46380	m	2+	54	4.9	0.0907407	3	1	1		1
2019-10-23	Regulus regulus	LK46381	m	1	53	5	0.0943396	1	0	0		1
2019-10-23	Regulus regulus	LK46382	f	1	53	5.4	0.101887	1	0	0		1
2019-10-23	Regulus regulus	LK46389	f	1	52	5.7	0.109615	1	0	0		1
2019-10-23	Regulus regulus	LK46390	m	1	55	5.9	0.107273	1	0	0		1
2019-10-23	Regulus regulus	LK46391	m	1	55	5.2	0.0945455	1	0	0		1
2019-10-23	Aegithalos caudatus	LK46393		1	65	8.6	0.132308	1	0	0		1
2019-10-23	Regulus regulus	LK46398	m	1	54	5.7	0.105556	1	0	0		1
2019-10-23	Regulus regulus	LK46399	m	1	53	5.7	0.107547	3	1	1		1
2019-10-23	Aegithalos caudatus	LK46401		1	64	8.7	0.135937	1	0	0		1
2019-10-23	Aegithalos caudatus	LK46403		1	65	8.4	0.129231	1	0	0		1
2019-10-23	Aegithalos caudatus	LK46405		1	67	8.8	0.131343	1	0	0		1
2019-10-23	Aegithalos caudatus	LK46407		1	63	8.3	0.131746	1	0	0		1
2019-10-23	Regulus regulus	LK46408	f	1	51	5	0.0980392	1	0	0		1
2019-10-23	Regulus regulus	LK46409	f	1	53	5.2	0.0981132	1	0	0		1
2019-10-23	Regulus regulus	LK46410	f	1	52	6	0.115385	1	0	0		1
2019-10-23	Phylloscopus collybita	LK46411		1	63	8.7	0.138095	1	0	0		1
2019-10-23	Regulus regulus	LK46412	m	1	55	6	0.109091	1	0	0		1
2019-10-23	Regulus regulus	LK46413	m	1	53	5.6	0.10566	1	0	0		1
2019-10-23	Regulus regulus	LK46414	m	1	54	5.3	0.0981481	1	0	0		1
2019-10-23	Regulus regulus	LK46415	m	1	54	5.6	0.103704	1	0	0		1
2019-10-23	Aegithalos caudatus	LK46418		1	66	8.9	0.134848	1	0	0		1
2019-10-23	Aegithalos caudatus	LK46420		1	63	8.1	0.128571	1	0	0		1
2019-10-23	Aegithalos caudatus	LK46421		1	66	8.4	0.127273	1	0	0		1
2019-10-23	Aegithalos caudatus	LK46422		1	62	8.2	0.132258	1	0	0		1
2019-10-23	Regulus regulus	LK46423	f	1	54	5.5	0.101852	1	0	0		1
2019-10-23	Regulus regulus	LK46424	m	2+	51	5.6	0.109804	3	1	1		1
2019-10-23	Regulus regulus	LK46425	m	1	52	5.6	0.107692	1	0	0		1
2019-10-23	Regulus regulus	LK46426	m	1		6		1		0		1
2019-10-23	Regulus regulus	LK46427	f	1		6.4		1		0		1
2019-10-23	Regulus regulus	LK46428	f	1	52	5.1	0.0980769	1	0	0		1
2019-10-23	Regulus regulus	LK46429	f	1	52	6.1	0.117308	1	0	0		1
2019-10-23	Aegithalos caudatus	LK46431		1	65	8.4	0.129231	1	0	0		1
2019-10-23	Aegithalos caudatus	LK46433		1		8.1		1		0		1
2019-10-23	Aegithalos caudatus	LK46435		1	65	8.7	0.133846	1	0	0		1
2019-10-23	Aegithalos caudatus	LK46439		1	64	8.1	0.126562	3	1	1		1
2019-10-23	Aegithalos caudatus	LK46440		1		8.3		1		0		1
2019-10-23	Aegithalos caudatus	LK46442		1	65	8	0.123077	1	0	0		1
2019-10-23	Aegithalos caudatus	LK46443		1		9		1		0		1
2019-10-23	Aegithalos caudatus	LK46445		1	63	7.9	0.125397	1	0	0		1
2019-10-23	Aegithalos caudatus	LK46446		1	65	8	0.123077	1	0	0		1
2019-10-23	Aegithalos caudatus	LK46448		1	64	8.6	0.134375	1	0	0		1
2019-10-23	Aegithalos caudatus	LK46450		1	65	8.7	0.133846	1	0	0		1
2019-10-23	Aegithalos caudatus	LK46451		1	65	8.4	0.129231	1	0	0		1
2019-10-23	Regulus regulus	LK46453	m	1	55	6.6	0.12	1	0	0		1
2019-10-23	Regulus regulus	LK46454	m	1	53	5.6	0.10566	1	0	0		1
2019-10-23	Regulus regulus	LK46455	m	1	54	5.6	0.103704	1	0	0		1
2019-10-23	Regulus regulus	LK46456	f	1	53	5.9	0.111321	1	0	0		1
2019-10-23	Regulus regulus	LK46457	f	1	53	5.1	0.0962264	1	0	0		1
2019-10-23	Troglodytes troglodytes	LK46467		1	46	9.3	0.202174	1	0	0		1
2019-10-23	Regulus regulus	LK46468	m	1	53	6.1	0.115094	1	0	0		1
2019-10-23	Regulus regulus	LK46469	m	1	56	5	0.0892857	1	0	0		1
2019-10-23	Regulus regulus	LK46471	m	1	54	5.5	0.101852	1	0	0		1
2019-10-23	Regulus regulus	LK46472	m	1	53	5.3	0.1	1	0	0		1
2019-10-23	Aegithalos caudatus	LK46476		1		8.5		1		0		1
2019-10-23	Aegithalos caudatus	LK46483		1		8.2		1		0		1
2019-10-23	Troglodytes troglodytes	LK46485		1		10.1		1		0		1
2019-10-23	Troglodytes troglodytes	LK46486		1	50	11.3	0.226	1	0	0		1
2019-10-23	Regulus regulus	LK46489	f	1	52	6.4	0.123077	1	0	0		1
2019-10-23	Regulus regulus	LK46490	f	1		5.8		1		0		1
2019-10-23	Aegithalos caudatus	LK46495		1		8.9		1		0		1
2019-10-23	Troglodytes troglodytes	LK46504		1	45	9.5	0.211111	1	0	0		1
2019-10-23	Aegithalos caudatus	VC30735		1	61	7.8	0.127869	1	0	0		1
2019-10-24	Turdus merula	HJ16658	f	1		91.5		1		0		0
2019-10-24	Turdus merula	HJ16664	f	2+		86.6		2		0		0
2019-10-24	Turdus merula	HJ16686	f	2+	129	90.9	0.704651	2	1	1	1	1
2019-10-24	Turdus merula	HJ16687	f	1	124	83	0.669355	1	0	0		1
2019-10-24	Turdus merula	HJ16688	f	1	123	78.6	0.639024	1	0	0		0
2019-10-24	Turdus merula	HJ16689	m	1	132	95.1	0.720455	1	0	0		0
2019-10-24	Turdus merula	HJ16690	f	1	131	88.7	0.677099	1	0	0		0
2019-10-24	Turdus merula	HJ16691	f	1	127	82.4	0.648819	1	0	0		0
2019-10-24	Turdus merula	HJ16692	m	2+	134	79.4	0.592537	2	0	0		0
2019-10-24	Turdus merula	HJ16693	m	2+	135	87.6	0.648889	2	0	0		0
2019-10-24	Turdus merula	HJ16694	f	1	129	90	0.697674	1	0	0		0
2019-10-24	Cyanistes caeruleus	K7T8062	f	1	62	10.9	0.175806	1	0	0		0
2019-10-24	Erithacus rubecula	K9Z1773		1	73	19	0.260274	1	0	0		1
2019-10-24	Erithacus rubecula	K9Z1774	m	2+	77	18.2	0.236364	2	0	0		1
2019-10-24	Erithacus rubecula	K9Z1775		1	71	17.2	0.242254	1	0	0		1
2019-10-24	Erithacus rubecula	K9Z1776	f	1	70	14	0.2	1	0	0		1
2019-10-24	Erithacus rubecula	K9Z1777		1	71	15.3	0.215493	1	0	0		1
2019-10-24	Erithacus rubecula	K9Z1778		1	73	15.4	0.210959	1	0	0		1
2019-10-24	Erithacus rubecula	K9Z1779		1	73	16.9	0.231507	1	0	0		1
2019-10-24	Erithacus rubecula	K9Z1780		2+	75	17.1	0.228	2	0	0		1
2019-10-24	Erithacus rubecula	K9Z1782	f	1	70	16.6	0.237143	1	0	0		0
2019-10-24	Erithacus rubecula	K9Z1783		2+	74	18	0.243243	2	0	0		1
2019-10-24	Erithacus rubecula	K9Z1784		1		14.1		1		0		1
2019-10-24	Erithacus rubecula	K9Z1786		1	74	15.2	0.205405	1	0	0		1
2019-10-24	Erithacus rubecula	K9Z1787		1	73	15.2	0.208219	1	0	0		1
2019-10-24	Erithacus rubecula	K9Z1788	f	2+	70	14	0.2	2	0	0		1
2019-10-24	Erithacus rubecula	K9Z1789		1	72	16.1	0.223611	1	0	0		1
2019-10-24	Erithacus rubecula	K9Z1790	m	1	75	15.5	0.206667	1	0	0		1
2019-10-24	Erithacus rubecula	K9Z1791	f	2+	70	15.2	0.217143	2	0	0		1
2019-10-24	Erithacus rubecula	K9Z1792	m	2+	76	19.4	0.255263	2	0	0		1
2019-10-24	Erithacus rubecula	K9Z1793		1		16.5		1		0		1
2019-10-24	Erithacus rubecula	K9Z1794		1		15.2		1		0		1
2019-10-24	Erithacus rubecula	K9Z1795	f	2+	70	15.9	0.227143	3	1	1		1
2019-10-24	Erithacus rubecula	K9Z1796	m	1	75	15.9	0.212	1	0	0		1
2019-10-24	Erithacus rubecula	K9Z1797		1	73	16	0.219178	1	0	0		1
2019-10-24	Erithacus rubecula	K9Z1798	f	1	70	15.5	0.221429	1	0	0		1
2019-10-24	Erithacus rubecula	K9Z1799		1		16.9		1		0		1
2019-10-24	Erithacus rubecula	K9Z1800		2+	75	15.6	0.208	3	1	1		1
2019-10-24	Erithacus rubecula	K9Z1801		1	72	16.1	0.223611	1	0	0		1
2019-10-24	Erithacus rubecula	K9Z1802		1	72	15.3	0.2125	1	0	0		1
2019-10-24	Erithacus rubecula	K9Z1803	f	2+	71	16.1	0.226761	3	1	1		1
2019-10-24	Erithacus rubecula	K9Z1804		1	74	15.1	0.204054	1	0	0		0
2019-10-24	Erithacus rubecula	K9Z1805	m	1	75	15.5	0.206667	1	0	0		1
2019-10-24	Erithacus rubecula	K9Z1806	f	2+	71	16.5	0.232394	3	1	1		1
2019-10-24	Erithacus rubecula	K9Z1807	f	1	70	15.1	0.215714	1	0	0		1
2019-10-24	Erithacus rubecula	K9Z1808		1	71	15.4	0.216901	1	0	0		0
2019-10-24	Erithacus rubecula	K9Z1809	f	2+	70	14.3	0.204286	2	0	0		0
2019-10-24	Erithacus rubecula	K9Z1810	f	1	69	15.4	0.223188	1	0	0		0
2019-10-24	Erithacus rubecula	K9Z1811		1	71	16.6	0.233803	1	0	0		0
2019-10-24	Erithacus rubecula	K9Z1812	m	1	75	15.7	0.209333	1	0	0		0
2019-10-24	Erithacus rubecula	K9Z1813		1	71	15.7	0.221127	1	0	0		0
2019-10-24	Erithacus rubecula	K9Z1814		1	73	16.7	0.228767	1	0	0		0
2019-10-24	Erithacus rubecula	K9Z1815		2+	72	15.9	0.220833	3	1	1		0
2019-10-24	Erithacus rubecula	K9Z1816		1	71	17.2	0.242254	1	0	0		0
2019-10-24	Erithacus rubecula	K9Z1817		1	73	17.8	0.243836	1	0	0		0
2019-10-24	Erithacus rubecula	K9Z1818	f	1	69	16.5	0.23913	1	0	0		0
2019-10-24	Erithacus rubecula	K9Z1819		1	73	18.4	0.252055	1	0	0		0
2019-10-24	Parus major	K9Z1820	m	1	80	19.4	0.2425	3	1	1		1
2019-10-24	Erithacus rubecula	K9Z1821	f	2+	71	14.2	0.2	3	1	1		0
2019-10-24	Erithacus rubecula	K9Z1822		2+	73	14.5	0.19863	3	1	1		1
2019-10-24	Erithacus rubecula	K9Z1823	f	1	70	14.3	0.204286	1	0	0		0
2019-10-24	Erithacus rubecula	K9Z1824	f	1	70	12.8	0.182857	1	0	0		0
2019-10-24	Parus major	K9Z1825	m	1	77	18.2	0.236364	1	0	0		1
2019-10-24	Erithacus rubecula	K9Z1826		1	71	16	0.225352	1	0	0		0
2019-10-24	Erithacus rubecula	K9Z1827		2+	74	17.5	0.236486	2	0	0		0
2019-10-24	Erithacus rubecula	K9Z1828		2+	74	14.6	0.197297	3	1	1		1
2019-10-24	Erithacus rubecula	K9Z1829		1	71	13.8	0.194366	1	0	0		0
2019-10-24	Erithacus rubecula	K9Z1830	f	1	70	14.3	0.204286	1	0	0		1
2019-10-24	Erithacus rubecula	K9Z1831		1	72	15.3	0.2125	1	0	0		0
2019-10-24	Erithacus rubecula	K9Z1832	m	1	75	16.5	0.22	1	0	0		0
2019-10-24	Erithacus rubecula	K9Z1833	m	1	77	15.3	0.198701	3	1	1		0
2019-10-24	Erithacus rubecula	K9Z1834	f	2+	69	14.5	0.210145	2	0	0		0
2019-10-24	Erithacus rubecula	K9Z1835		1		15.2		1		0		0
2019-10-24	Erithacus rubecula	K9Z1836		1		15.2		1		0		0
2019-10-24	Erithacus rubecula	K9Z1837		2+		16.5		2		0		1
2019-10-24	Erithacus rubecula	K9Z1838		1		14.7		1		0		0
2019-10-24	Parus major	K9Z1839	m	1		19.8		1		0		0
2019-10-24	Parus major	K9Z1840	m	1		18.1		1		0		0
2019-10-24	Erithacus rubecula	K9Z1841		1	73	14.1	0.193151	1	0	0		0
2019-10-24	Erithacus rubecula	K9Z1842		1		16.7		1		0		0
2019-10-24	Erithacus rubecula	K9Z1843		1		15.9		1		0		0
2019-10-24	Erithacus rubecula	K9Z1844		1		16.4		1		0		1
2019-10-24	Erithacus rubecula	K9Z1845		1		18.8		1		0		0
2019-10-24	Erithacus rubecula	K9Z1846		1	73	15.3	0.209589	1	0	0		0
2019-10-24	Regulus regulus	LK46391	m	1		5.6		1		0		0
2019-10-24	Aegithalos caudatus	LK46450		1		8.3		1		0		0
2019-10-24	Troglodytes troglodytes	LK46505		1	49	9.2	0.187755	1	0	0		1
2019-10-24	Troglodytes troglodytes	LK46506		1	48	9.1	0.189583	1	0	0		1
2019-10-24	Troglodytes troglodytes	LK46507		1	46	75	1.63043	1	0	0		1
2019-10-24	Aegithalos caudatus	LK46508		1	66	8.4	0.127273	1	0	0		1
2019-10-24	Troglodytes troglodytes	LK46509		1	48	8	0.166667	1	0	0		1
2019-10-24	Troglodytes troglodytes	LK46510		1	50	9.8	0.196	1	0	0		1
2019-10-24	Troglodytes troglodytes	LK46511		1	47	8.5	0.180851	1	0	0		1
2019-10-24	Troglodytes troglodytes	LK46512		1	46	7.4	0.16087	1	0	0		1
2019-10-24	Troglodytes troglodytes	LK46513		1	47	7.9	0.168085	1	0	0		1
2019-10-24	Troglodytes troglodytes	LK46514		1	48	8.5	0.177083	1	0	0		1
2019-10-24	Certhia familiaris	LK46515		1	65	9.1	0.14	1	0	0		1
2019-10-24	Regulus regulus	LK46516	m	1	53	5	0.0943396	1	0	0		1
2019-10-24	Regulus regulus	LK46517	f	1	50	4.9	0.098	1	0	0		1
2019-10-24	Regulus regulus	LK46518	m	1	56	5.6	0.1	1	0	0		1
2019-10-24	Regulus regulus	LK46519	f	2+	52	4.9	0.0942308	2	0	0		1
2019-10-24	Regulus regulus	LK46520	m	1	54	5.3	0.0981481	3	1	1		1
2019-10-24	Regulus regulus	LK46521	f	1	51	4.9	0.0960784	1	0	0		1
2019-10-24	Regulus regulus	LK46522	m	2+	56	6	0.107143	2	0	0		1
2019-10-24	Regulus regulus	LK46523	f	1	52	5.2	0.1	1	0	0		1
2019-10-24	Regulus regulus	LK46524	f	1	54	5.4	0.1	1	0	0		1
2019-10-24	Regulus regulus	LK46525	m	1	52	4.6	0.0884615	1	0	0		1
2019-10-24	Regulus regulus	LK46526	m	1	54	6.4	0.118519	1	0	0		1
2019-10-24	Regulus regulus	LK46527	m	1	53	5.7	0.107547	1	0	0		1
2019-10-24	Regulus regulus	LK46528	m	1	54	5.3	0.0981481	1	0	0		1
2019-10-24	Aegithalos caudatus	LK46531		1	63	8.8	0.139683	1	0	0		1
2019-10-24	Aegithalos caudatus	LK46532		1	62	8	0.129032	1	0	0		1
2019-10-24	Aegithalos caudatus	LK46533		1	65	8.6	0.132308	1	0	0		1
2019-10-24	Aegithalos caudatus	LK46537		1	65	79	1.21538	3	1	1		1
2019-10-24	Aegithalos caudatus	LK46538		1	63	7.6	0.120635	1	0	0		1
2019-10-24	Regulus regulus	LK46540	m	1	52	5.4	0.103846	1	0	0		1
2019-10-24	Regulus regulus	LK46541	f	1	52	5.4	0.103846	1	0	0		0
2019-10-24	Regulus regulus	LK46542	m	1	52	5.6	0.107692	1	0	0		0
2019-10-24	Regulus regulus	LK46543	f	2+	53	5	0.0943396	2	0	0		0
2019-10-24	Regulus regulus	LK46544	f	1	52	5.1	0.0980769	1	0	0		0
2019-10-24	Regulus regulus	LK46545	m	1		6.1		1		0		0
2019-10-24	Regulus regulus	LK46546	m	2+	54	5.8	0.107407	2	0	0		0
2019-10-24	Regulus regulus	LK46547	m	1	52	4.8	0.0923077	1	0	0		0
2019-10-24	Regulus regulus	LK46548	m	2+	54	5.2	0.0962963	2	0	0		0
2019-10-24	Regulus regulus	LK46549	f	1	54	5.2	0.0962963	1	0	0		0
2019-10-24	Regulus regulus	LK46550	m	2+	55	5	0.0909091	2	0	0		0
2019-10-24	Regulus regulus	LK46551	m	1	53	5	0.0943396	3	1	1		0
2019-10-24	Certhia familiaris	LK46553		1	65	9.8	0.150769	1	0	0		0
2019-10-24	Regulus regulus	LK46554	m	1	54	5.4	0.1	1	0	0		0
2019-10-24	Regulus regulus	LK46555	f	1	54	5.5	0.101852	1	0	0		0
2019-10-24	Regulus regulus	LK46556	f	1	52	5.8	0.111538	3	1	1		1
2019-10-24	Regulus regulus	LK46557	m	2+	54	5.5	0.101852	2	0	0		0
2019-10-24	Regulus regulus	LK46559	m	1	54	5.4	0.1	1	0	0		1
2019-10-24	Regulus regulus	LK46560	m	1	53	5.9	0.111321	1	0	0		0
2019-10-24	Aegithalos caudatus	LK46561		1	65	9.1	0.14	1	0	0		1
2019-10-24	Aegithalos caudatus	LK46565		1	62	8.6	0.13871	1	0	0		0
2019-10-24	Aegithalos caudatus	LK46566		1	64	9.4	0.146875	1	0	0		0
2019-10-24	Aegithalos caudatus	LK46567		1	66	8.4	0.127273	1	0	0		0
2019-10-24	Aegithalos caudatus	LK46569		1	63	9.1	0.144444	1	0	0		0
2019-10-24	Regulus regulus	LK46573	f	1	52	5.8	0.111538	1	0	0		0
2019-10-24	Regulus regulus	LK46574	f	1	54	5.4	0.1	1	0	0		0
2019-10-24	Regulus regulus	LK46575	f	1	52	5.5	0.105769	1	0	0		1
2019-10-24	Regulus regulus	LK46576	m	1	56	5.6	0.1	1	0	0		1
2019-10-24	Regulus regulus	LK46578	m	1	54	5.2	0.0962963	3	1	1		0
2019-10-24	Regulus regulus	LK46579	m	1	54	5.1	0.0944444	1	0	0		0
2019-10-24	Regulus regulus	LK46580	f	1	51	5.4	0.105882	3	1	1		1
2019-10-24	Regulus regulus	LK46581	m	1	55	5.9	0.107273	1	0	0		0
2019-10-24	Regulus regulus	LK46582	m	1	53	5.4	0.101887	1	0	0		0
2019-10-24	Aegithalos caudatus	LK46583		1	67	8.4	0.125373	1	0	0		0
2019-10-24	Aegithalos caudatus	LK46584		1	63	7.6	0.120635	1	0	0		1
2019-10-24	Aegithalos caudatus	LK46585		1	64	8.3	0.129688	1	0	0		0
2019-10-24	Aegithalos caudatus	LK46586		1	65	8.4	0.129231	3	1	1		0
2019-10-24	Regulus regulus	LK46587	m	1	55	5.7	0.103636	1	0	0		0
2019-10-24	Regulus regulus	LK46588	m	2+	54	5.5	0.101852	2	0	0		0
2019-10-24	Regulus regulus	LK46589	m	1	55	5.2	0.0945455	1	0	0		1
2019-10-24	Regulus regulus	LK46590	m	1	55	5.2	0.0945455	3	1	1		1
2019-10-24	Regulus regulus	LK46591	m	2+	55	6.3	0.114545	2	0	0		0
2019-10-24	Regulus regulus	LK46592	f	1	52	5.6	0.107692	1	0	0		0
2019-10-24	Regulus regulus	LK46593	m	1	52	6.2	0.119231	1	0	0		0
2019-10-24	Regulus regulus	LK46594	m	1	55	5.7	0.103636	1	0	0		0
2019-10-24	Regulus regulus	LK46595	m	1	53	5.3	0.1	1	0	0		0
2019-10-24	Regulus regulus	LK46596	f	1	52	5.4	0.103846	1	0	0		0
2019-10-24	Regulus regulus	LK46597	m	1	55	5.8	0.105455	1	0	0		0
2019-10-24	Regulus regulus	LK46599	m	1	55	6.2	0.112727	1	0	0		0
2019-10-24	Regulus regulus	LK46600	m	1		6.3		1		0		0
2019-10-24	Regulus regulus	LK46601	f	2+		5.9		3		1		0
2019-10-24	Regulus regulus	LK46602	m	1		6		1		0		0
2019-10-24	Certhia familiaris	LK46604		1	64	9.2	0.14375	1	0	0		0
2019-10-24	Aegithalos caudatus	LK46605		1		8.2		1		0		1
2019-10-24	Aegithalos caudatus	LK46607		1		8.9		1		0		0
2019-10-24	Aegithalos caudatus	LK46609		1		8.6		1		0		1
2019-10-24	Aegithalos caudatus	LK46612		1		8.2		1		0		0
2019-10-24	Aegithalos caudatus	LK46614		1		8.2		1		0		0
2019-10-24	Aegithalos caudatus	LK46615		1		8.3		1		0		1
2019-10-24	Aegithalos caudatus	LK46616		1		8.7		1		0		0
2019-10-24	Troglodytes troglodytes	LK46620		1		9.9		1		0		0
2019-10-24	Regulus regulus	LK46621	m	1		5.5		1		0		0
2019-10-24	Regulus regulus	LK46622	m	1		5.7		1		0		0
2019-10-25	Turdus merula	HJ00792	m	2+	133	94.1	0.707519	2	0	0		0
2019-10-25	Turdus merula	HJ16588	m	2+		104.4		2		0		0
2019-10-25	Turdus merula	HJ16662	f	1	131	88.2	0.673282	1	0	0		1
2019-10-25	Turdus merula	HJ16695	m	2+	132	93.9	0.711364	2	0	0		1
2019-10-25	Turdus merula	HJ16696	f	1	126	85.5	0.678571	1	0	0		1
2019-10-25	Turdus merula	HJ16697	m	1	131	95.1	0.725954	1	0	0		1
2019-10-25	Turdus merula	HJ16698	f	1		88.8		1		0		0
2019-10-25	Turdus merula	HJ16699	f	2+		91.6		3		1		0
2019-10-25	Turdus merula	HJ16700	f	1		81.4		1		0		0
2019-10-25	Turdus merula	HJ16701	f	1	127	91	0.716535	1	0	0		0
2019-10-25	Turdus merula	HJ16702	m	1	130	101.4	0.78	1	0	0		0
2019-10-25	Turdus merula	HJ16703	f	2+	130	94	0.723077	3	1	1		0
2019-10-25	Cyanistes caeruleus	K2V5591	m	2+	69	11.2	0.162319	2	0	0		0
2019-10-25	Cyanistes caeruleus	K3N6174	m	2+	69	11.5	0.166667	2	0	0		1
2019-10-25	Parus major	K7T6997	m	2+		18.9		3		1		1
2019-10-25	Erithacus rubecula	K9Z1089		1	73	17.3	0.236986	1	0	0		1
2019-10-25	Erithacus rubecula	K9Z1824		1		12.4		1		0		0
2019-10-25	Erithacus rubecula	K9Z1835		1		15.5		1		0		1
2019-10-25	Erithacus rubecula	K9Z1848	f	1	70	14.3	0.204286	1	0	0		1
2019-10-25	Erithacus rubecula	K9Z1849	f	1	69	15.1	0.218841	1	0	0		0
2019-10-25	Erithacus rubecula	K9Z1850		1	73	16.6	0.227397	1	0	0		1
2019-10-25	Erithacus rubecula	K9Z1851		2+		15.3		2		0		0
2019-10-25	Erithacus rubecula	K9Z1852	f	2+	71	16.5	0.232394	3	1	1		1
2019-10-25	Erithacus rubecula	K9Z1853	f	2+	71	16.1	0.226761	2	0	0		1
2019-10-25	Erithacus rubecula	K9Z1854		2+		15.5		3		1		1
2019-10-25	Erithacus rubecula	K9Z1855		1	74	17.5	0.236486	1	0	0		1
2019-10-25	Erithacus rubecula	K9Z1856	f	1	70	16.3	0.232857	1	0	0		0
2019-10-25	Erithacus rubecula	K9Z1857	f	2+	70	16.9	0.241429	2	0	0		0
2019-10-25	Erithacus rubecula	K9Z1859	f	1	70	16.3	0.232857	1	0	0		0
2019-10-25	Erithacus rubecula	K9Z1860		2+	73	17	0.232877	3	1	1		1
2019-10-25	Erithacus rubecula	K9Z1862		1	73	16	0.219178	1	0	0		0
2019-10-25	Erithacus rubecula	K9Z1863		2+		17		3		1		1
2019-10-25	Erithacus rubecula	K9Z1864		2+	73	17.6	0.241096	3	1	1		1
2019-10-25	Certhia familiaris	LK35132		2+	66	8.6	0.130303	2	0	0		0
2019-10-25	Regulus regulus	LK46540	m	1	52	5.9	0.113462	1	0	0		0
2019-10-25	Regulus regulus	LK46557	m	1		4.9		1		0		0
2019-10-25	Regulus regulus	LK46631	m	1		5.9		1		0		1
2019-10-25	Regulus regulus	LK46632	m	1		6.2		1		0		0
2019-10-25	Regulus regulus	LK46633	m	1		5.9		1		0		0
2019-10-25	Regulus regulus	LK46634	m	1	53	5.8	0.109434	1	0	0		1
2019-10-25	Regulus regulus	LK46635	m	2+	55	5.5	0.1	2	0	0		1
2019-10-25	Regulus regulus	LK46636	f	1		5.1		1		0		1
2019-10-25	Regulus regulus	LK46637	f	2+	49	4.8	0.0979592	2	0	0		0
2019-10-25	Regulus regulus	LK46638	f	1		5.7		1		0		0
2019-10-25	Regulus regulus	LK46639	f	1		5.6		1		0		0
2019-10-25	Regulus regulus	LK46640	m	2+		4.9		2		0		1
2019-10-25	Regulus regulus	LK46641	f	1		5.3		1		0		1
2019-10-25	Certhia familiaris	LK46643		1	63	8.5	0.134921	1	0	0		0
2019-10-25	Regulus regulus	LK46645	m	1	53	5.2	0.0981132	1	0	0		0
2019-10-25	Regulus regulus	LK46646	m	1	54	4.8	0.0888889	1	0	0		1
2019-10-25	Regulus regulus	LK46647	m	1	57	5.5	0.0964912	1	0	0		1
2019-10-25	Regulus regulus	LK46648	m	1	54	5.5	0.101852	1	0	0		0
2019-10-25	Regulus regulus	LK46649	m	1	54	4.7	0.087037	1	0	0		1
2019-10-25	Regulus regulus	LK46650	m	1	54	5.8	0.107407	1	0	0		0
2019-10-25	Regulus regulus	LK46651	f	1	52	4.9	0.0942308	1	0	0		1
2019-10-25	Troglodytes troglodytes	LK46652		1	46	7.3	0.158696	1	0	0		1
2019-10-25	Certhia familiaris	LK46653		1	66	9.5	0.143939	1	0	0		0
2019-10-25	Regulus regulus	LK46654	f	1	50	5.1	0.102	1	0	0		0
2019-10-25	Regulus regulus	LK46655	m	1	54	5.3	0.0981481	1	0	0		0
2019-10-25	Regulus regulus	LK46656	f	1	52	5	0.0961538	1	0	0		0
2019-10-25	Phylloscopus collybita	LK46657		1	64	9	0.140625	1	0	0		1
2019-10-25	Regulus regulus	LK46658	m	2+		4.8		2		0		0
2019-10-25	Regulus regulus	LK46659	m	1	54	6.5	0.12037	1	0	0		0
2019-10-25	Regulus regulus	LK46660	f	1	50	5.6	0.112	1	0	0		0
2019-10-25	Regulus regulus	LK46661	m	1	53	5.2	0.0981132	1	0	0		0
2019-10-25	Regulus regulus	LK46662	m	1	51	5.1	0.1	1	0	0		0
2019-10-25	Regulus regulus	LK46663	m	1	54	5.8	0.107407	1	0	0		0
2019-10-25	Regulus regulus	LK46664	f	1	50	5.6	0.112	1	0	0		0
2019-10-25	Regulus regulus	LK46665	f	2+	51	5.7	0.111765	2	0	0		0
2019-10-25	Regulus regulus	LK46666	f	1	50	5.6	0.112	1	0	0		0
2019-10-25	Regulus regulus	LK46667	m	1	54	5.8	0.107407	1	0	0		0
2019-10-25	Regulus regulus	LK46668	f	1	54	6.1	0.112963	1	0	0		0
2019-10-25	Regulus regulus	LK46669	f	1	51	5.7	0.111765	1	0	0		0
2019-10-25	Certhia familiaris	LK46670		1	63	9.4	0.149206	1	0	0		0
2019-10-25	Regulus regulus	LK46671	m	1	55	5.9	0.107273	1	0	0		0
2019-10-25	Regulus regulus	LK46672	m	1	54	6.1	0.112963	1	0	0		0
2019-10-25	Regulus regulus	LK46673	f	1	53	5.6	0.10566	1	0	0		0
2019-10-25	Regulus regulus	LK46674	m	1	54	5.3	0.0981481	1	0	0		0
2019-10-25	Regulus regulus	LK46675	f	1	53	5.5	0.103774	1	0	0		0
2019-10-25	Regulus regulus	LK46676	m	1	53	6	0.113208	1	0	0		0
2019-10-25	Regulus regulus	LK46677	f	1	52	5.6	0.107692	1	0	0		0
2019-10-25	Regulus regulus	LK46678	m	1	55	5.6	0.101818	1	0	0		0
2019-10-25	Regulus regulus	LK46679	f	1	51	6.4	0.12549	1	0	0		0
2019-10-25	Regulus regulus	LK46680	m	1	53	5.6	0.10566	1	0	0		1
2019-10-25	Regulus regulus	LK46681	m	1	53	6.1	0.115094	1	0	0		0
2019-10-25	Regulus regulus	LK46683	f	1	53	5.5	0.103774	1	0	0		0
2019-10-25	Regulus regulus	LK46684	m	1		6		1		0		1
2019-10-25	Regulus regulus	LK46685	f	2+	51	5.9	0.115686	2	0	0		0
2019-10-25	Regulus regulus	LK46686	m	1		5.6		1		0		0
2019-10-25	Regulus regulus	LK46687	m	1	55	6.5	0.118182	1	0	0		0
2019-10-25	Regulus regulus	LK46688	f	1	52	6.1	0.117308	1	0	0		0
2019-10-25	Troglodytes troglodytes	LK46692		1		10.1		1		0		1
2019-10-25	Regulus regulus	LK46693	f	2+		6		3		1		1
2019-10-25	Regulus regulus	LK46694	f	1		6.2		1		0		0
2019-10-25	Regulus regulus	LK46695	f	1		5.3		1		0		0
2019-10-26	Turdus merula	HJ16555	m	1		87.1		1		0		1
2019-10-26	Turdus merula	HJ16571	f	1		91		1		0		0
2019-10-26	Turdus merula	HJ16642	m	1		87.4		1		0		0
2019-10-26	Turdus merula	HJ16704	m	1	132	94.9	0.718939	1	0	0		0
2019-10-26	Turdus merula	HJ16705	f	1	122	77.8	0.637705	1	0	0		0
2019-10-26	Turdus merula	HJ16706	f	1		90.5		1		0		0
2019-10-26	Turdus merula	HJ16707	m	1	130	81.5	0.626923	1	0	0		0
2019-10-26	Parus major	K9Z0173	m	1		17.3		1		0		0
2019-10-26	Erithacus rubecula	K9Z1089		1		18.3		1		0		0
2019-10-26	Erithacus rubecula	K9Z1832		1		15		1		0		0
2019-10-26	Erithacus rubecula	K9Z1865	f	1	70	17.1	0.244286	1	0	0		1
2019-10-26	Parus major	K9Z1866	f	2+	76	17.6	0.231579	2	0	0		0
2019-10-26	Parus major	K9Z1867	f	2+	77	16.6	0.215584	2	0	0		0
2019-10-26	Parus major	K9Z1868	m	1	76	16.9	0.222368	1	0	0		0
2019-10-26	Parus major	K9Z1869	m	2+	80	18.7	0.23375	3	1	1		1
2019-10-26	Cyanistes caeruleus	K9Z1870	f	1	64	10	0.15625	1	0	0		0
2019-10-26	Cyanistes caeruleus	K9Z1871	f	1	63	10	0.15873	1	0	0		0
2019-10-26	Cyanistes caeruleus	K9Z1872	f	1	64	10.1	0.157812	1	0	0		1
2019-10-26	Cyanistes caeruleus	K9Z1873	m	1	67	11.6	0.173134	1	0	0		0
2019-10-26	Parus major	K9Z1874	m	1	75	16.6	0.221333	1	0	0		1
2019-10-26	Parus major	K9Z1875	m	1	74	17.4	0.235135	1	0	0		0
2019-10-26	Cyanistes caeruleus	K9Z1876	f	2+	65	10.6	0.163077	2	0	0		0
2019-10-26	Erithacus rubecula	K9Z1877	f	2+	71	13.7	0.192958	2	0	0		0
2019-10-26	Erithacus rubecula	K9Z1878		1	71	16.5	0.232394	1	0	0		0
2019-10-26	Certhia familiaris	LK39554		1		8.5		1		0		0
2019-10-26	Certhia familiaris	LK46515		1	65	8.9	0.136923	1	0	0		1
2019-10-26	Aegithalos caudatus	LK46561		1		8.7		1		0		0
2019-10-26	Aegithalos caudatus	LK46569		1		8.3		1		0		0
2019-10-26	Regulus regulus	LK46655	m	1	54	5.3	0.0981481	1	0	0		0
2019-10-26	Regulus regulus	LK46674	m	1		5		1		0		0
2019-10-26	Regulus regulus	LK46696	f	1	52	5	0.0961538	1	0	0		0
2019-10-26	Regulus regulus	LK46697	m	1	54	5.3	0.0981481	1	0	0		0
2019-10-26	Aegithalos caudatus	LK46698		1	61	7.7	0.12623	1	0	0		0
2019-10-26	Regulus regulus	LK46700	f	1	50	5.1	0.102	1	0	0		0
2019-10-26	Phylloscopus collybita	LK46701		2+	58	6.1	0.105172	2	0	0		0
2019-10-26	Phylloscopus collybita	LK46702		1	60	8.9	0.148333	1	0	0		0
2019-10-26	Regulus regulus	LK46704	f	1	51	4.9	0.0960784	1	0	0		0
2019-10-26	Regulus regulus	LK46705	f	1	50	5.2	0.104	1	0	0		1
2019-10-26	Regulus regulus	LK46706	m	1	55	5.2	0.0945455	1	0	0		0
2019-10-26	Regulus regulus	LK46707	m	1	54	5.3	0.0981481	1	0	0		1
2019-10-26	Regulus regulus	LK46708	m	1	54	5.1	0.0944444	1	0	0		0
2019-10-26	Regulus regulus	LK46709	m	2+	56	6.3	0.1125	3	1	1		0
2019-10-26	Regulus regulus	LK46710	m	1	54	5.6	0.103704	1	0	0		0
2019-10-26	Regulus regulus	LK46711	m	2+	55	5.4	0.0981818	2	0	0		0
2019-10-26	Regulus regulus	LK46712	f	1	51	4.9	0.0960784	1	0	0		0
2019-10-26	Regulus regulus	LK46713	m	1	54	5.4	0.1	1	0	0		0
2019-10-26	Regulus regulus	LK46714	m	1	53	4.9	0.0924528	1	0	0		1
2019-10-26	Regulus regulus	LK46715	m	1	52	5.8	0.111538	1	0	0		0
2019-10-26	Regulus regulus	LK46716	f	1	51	5.3	0.103922	1	0	0		0
2019-10-26	Regulus regulus	LK46717	m	1	55	5.1	0.0927273	1	0	0		0
2019-10-26	Aegithalos caudatus	LK46719		1	66	7.7	0.116667	1	0	0		0
2019-10-26	Regulus regulus	LK46722	f	1		5		1		0		0
2019-10-26	Regulus regulus	LK46723	m	1	53	5.4	0.101887	1	0	0		0
2019-10-26	Phylloscopus collybita	LK46724		1	60	7.1	0.118333	1	0	0		0
2019-10-26	Certhia familiaris	LK46725		1	60	8.6	0.143333	1	0	0		0
2019-10-26	Regulus regulus	LK46727	f	1	52	5.4	0.103846	1	0	0		0
2019-10-26	Regulus regulus	LK46728	f	1	53	5.1	0.0962264	1	0	0		0
2019-10-26	Regulus regulus	LK46729	m	1	55	5.5	0.1	1	0	0		0
2019-10-26	Regulus regulus	LK46730	m	1	53	5.7	0.107547	1	0	0		0
2019-10-26	Regulus regulus	LK46731	m	1	54	5.2	0.0962963	1	0	0		0
2019-10-26	Regulus regulus	LK46732	f	1		5		1		0		0
2019-10-26	Troglodytes troglodytes	LK46733		1	50	10	0.2	1	0	0		0
2019-10-26	Regulus regulus	LK46734	m	1	55	5.3	0.0963636	1	0	0		0
2019-10-26	Regulus regulus	LK46740	f	1	51	5.8	0.113725	1	0	0		0
2019-10-26	Troglodytes troglodytes	LK46741		1	47	8.8	0.187234	1	0	0		0
2019-10-26	Regulus regulus	LK46742	m	1	53	5.8	0.109434	1	0	0		0
2019-10-26	Regulus regulus	LK46744	m	1	52	5.5	0.105769	1	0	0		0
2019-10-26	Regulus regulus	LK46745	m	1	54	6.3	0.116667	1	0	0		1
2019-10-26	Troglodytes troglodytes	LK46746		1		10.5		1		0		0
2019-10-27	Turdus merula	HJ16705	f	1		74.5		1		0		0
2019-10-27	Turdus merula	HJ16708	m	1		95.9		1		0		0
2019-10-27	Parus major	K7T7613	f	1	73	16.7	0.228767	1	0	0		0
2019-10-27	Erithacus rubecula	K9Z1573		1		15		1		0		0
2019-10-27	Erithacus rubecula	K9Z1715		1		17.8		1		0		0
2019-10-27	Erithacus rubecula	K9Z1832		1		15.5		1		0		1
2019-10-27	Erithacus rubecula	K9Z1879		1	72	15.5	0.215278	1	0	0		0
2019-10-27	Erithacus rubecula	K9Z1880		1		15.3		1		0		1
2019-10-27	Erithacus rubecula	K9Z1881	f	1	68	17.2	0.252941	1	0	0		0
2019-10-27	Certhia familiaris	LK35132		2+		8.4		2		0		0
2019-10-27	Regulus regulus	LK46706	m	1		5.2		1		0		0
2019-10-27	Regulus regulus	LK46747	f	2+	50	5.6	0.112	3	1	1		0
2019-10-27	Regulus regulus	LK46763	m	1	55	5.4	0.0981818	1	0	0		1
2019-10-27	Regulus regulus	LK46764		1	55	5.2	0.0945455	1	0	0		0
2019-10-27	Regulus regulus	LK46765	m	1	55	5.6	0.101818	1	0	0		0
2019-10-27	Regulus regulus	LK46766	m	1	55	5.7	0.103636	1	0	0		0
2019-10-27	Regulus regulus	LK46767	m	1	54	5.6	0.103704	1	0	0		0
2019-10-27	Regulus regulus	LK46768	m	1	54	5.7	0.105556	1	0	0		1
2019-10-27	Regulus regulus	LK46769	f	1	53	6.4	0.120755	1	0	0		0
2019-10-27	Regulus regulus	LK46770	m	2+	56	5.8	0.103571	3	1	1		1
2019-10-27	Regulus regulus	LK46771	f	1	51	5.6	0.109804	1	0	0		0
2019-10-27	Regulus regulus	LK46772	f	1	51	5.2	0.101961	1	0	0		1
2019-10-27	Regulus regulus	LK46773	m	1	55	5.4	0.0981818	1	0	0		1
2019-10-27	Regulus regulus	LK46774	f	2+	51	5	0.0980392	3	1	1		0
2019-10-27	Regulus regulus	LK46775	f	2+	52	5.5	0.105769	3	1	1		0
2019-10-27	Regulus regulus	LK46776	m	1	55	6	0.109091	1	0	0		0
2019-10-27	Aegithalos caudatus	LK46778		1	61	7.4	0.121311	1	0	0		1
2019-10-27	Regulus regulus	LK46780	f	1	52	5.3	0.101923	1	0	0		1
2019-10-27	Regulus regulus	LK46781	f	1	52	5	0.0961538	1	0	0		0
2019-10-27	Regulus regulus	LK46782	f	1	52	4.6	0.0884615	1	0	0		0
2019-10-27	Regulus regulus	LK46783	m	1	55	5.8	0.105455	1	0	0		0
2019-10-27	Troglodytes troglodytes	LK46787		1	49	9.2	0.187755	1	0	0		0
2019-10-27	Regulus regulus	LK46788	m	2+	54	5.7	0.105556	2	0	0		0
2019-10-27	Regulus regulus	LK46789	f	1	51	5.2	0.101961	1	0	0		0
2019-10-27	Regulus regulus	LK46790	m	1	53	5.8	0.109434	1	0	0		1
2019-10-27	Regulus regulus	LK46791	m	1	55	6.2	0.112727	1	0	0		0
2019-10-27	Regulus regulus	LK46792	m	1	54	5.5	0.101852	1	0	0		0
2019-10-27	Regulus regulus	LK46793	m	1	53	6	0.113208	1	0	0		0
2019-10-27	Regulus regulus	LK46794	m	1	53	5.6	0.10566	1	0	0		0
2019-10-27	Regulus regulus	LK46795	m	1	54	5.4	0.1	1	0	0		0
2019-10-27	Regulus regulus	LK46796	m	1	53	5.5	0.103774	1	0	0		0
2019-10-27	Aegithalos caudatus	LK46798		1	66	8.5	0.128788	1	0	0		1
2019-10-28	Turdus merula	HJ16644	f	1				1		0		0
2019-10-28	Turdus merula	HJ16709	f	1	126	84.6	0.671429	1	0	0		0
2019-10-28	Turdus merula	HJ16710	f	2+		78.9		2		0		0
2019-10-28	Parus major	K7T7866	m	1				1		0		1
2019-10-28	Erithacus rubecula	K9Z1855		1		17.4		1		0		0
2019-10-28	Erithacus rubecula	K9Z1864		2+				2		0		1
2019-10-28	Erithacus rubecula	K9Z1881		1				1		0		0
2019-10-28	Erithacus rubecula	K9Z1883		1		15.3		1		0		1
2019-10-28	Erithacus rubecula	K9Z1884		1		17.9		1		0		0
2019-10-28	Erithacus rubecula	K9Z1885		1		18.2		1		0		1
2019-10-28	Erithacus rubecula	K9Z1886		2+		17.3		2		0		0
2019-10-28	Erithacus rubecula	K9Z1887		1				1		0		0
2019-10-28	Erithacus rubecula	K9Z1888		1				1		0		0
2019-10-28	Erithacus rubecula	K9Z1889		1				1		0		0
2019-10-28	Erithacus rubecula	K9Z1890		1				1		0		0
2019-10-28	Erithacus rubecula	K9Z1891		1	73	17.2	0.235616	1	0	0		0
2019-10-28	Erithacus rubecula	K9Z1892		1				1		0		0
2019-10-28	Erithacus rubecula	K9Z1893		1				1		0		0
2019-10-28	Erithacus rubecula	K9Z1894		2+				2		0		0
2019-10-28	Erithacus rubecula	K9Z1895		1				1		0		0
2019-10-28	Erithacus rubecula	K9Z1896		1				1		0		1
2019-10-28	Erithacus rubecula	K9Z1897		1				1		0		0
2019-10-28	Erithacus rubecula	K9Z1898		2+		16		2		0		1
2019-10-28	Erithacus rubecula	K9Z1901		1	72	15.4	0.213889	1	0	0		1
2019-10-28	Erithacus rubecula	K9Z1903		1	74	18.2	0.245946	1	0	0		0
2019-10-28	Erithacus rubecula	K9Z1904	f	1	70	17.1	0.244286	1	0	0		0
2019-10-28	Erithacus rubecula	K9Z1905		1	72	17	0.236111	1	0	0		0
2019-10-28	Erithacus rubecula	K9Z1906		1	74			1		0		0
2019-10-28	Erithacus rubecula	K9Z1907		1	72	19.1	0.265278	1	0	0		0
2019-10-28	Erithacus rubecula	K9Z1908		1	73	15.9	0.217808	1	0	0		0
2019-10-28	Erithacus rubecula	K9Z1909	f	1	70	16.5	0.235714	1	0	0		0
2019-10-28	Erithacus rubecula	K9Z1910	f	1	70	16.9	0.241429	1	0	0		1
2019-10-28	Erithacus rubecula	K9Z1911		2+	72	16.9	0.234722	2	0	0		0
2019-10-28	Erithacus rubecula	K9Z1912		1	73	16.7	0.228767	1	0	0		0
2019-10-28	Parus major	K9Z1913	m	2+	76	21.2	0.278947	2	0	0		1
2019-10-28	Erithacus rubecula	K9Z1914	f	1	69	16.4	0.237681	1	0	0		0
2019-10-28	Erithacus rubecula	K9Z1915	f	1	70	16.1	0.23	1	0	0		0
2019-10-28	Erithacus rubecula	K9Z1916	f	1	70	15.8	0.225714	1	0	0		0
2019-10-28	Parus major	K9Z1917	f	1	73	16.4	0.224658	1	0	0		1
2019-10-28	Erithacus rubecula	K9Z1919		1	73	19.1	0.261644	1	0	0		0
2019-10-28	Erithacus rubecula	K9Z1920		1	74	18.3	0.247297	1	0	0		0
2019-10-28	Erithacus rubecula	K9Z1921		1	73	18.1	0.247945	1	0	0		1
2019-10-28	Erithacus rubecula	K9Z1922	f	1	69	16.8	0.243478	1	0	0		0
2019-10-28	Erithacus rubecula	K9Z1923	m	1	75	17.7	0.236	1	0	0		0
2019-10-28	Erithacus rubecula	K9Z1925		1	72	16.3	0.226389	1	0	0		0
2019-10-28	Erithacus rubecula	K9Z1926	f	1	70	16.6	0.237143	1	0	0		0
2019-10-28	Erithacus rubecula	K9Z1927	f	1	70	17.7	0.252857	1	0	0		0
2019-10-28	Erithacus rubecula	K9Z1928		2+	72	17.8	0.247222	2	0	0		0
2019-10-28	Troglodytes troglodytes	LK39391		1	49	10	0.204082	1	0	0		0
2019-10-28	Regulus regulus	LK46693	f	2+		5.5		3		1		1
2019-10-28	Regulus regulus	LK46800	m	1		5.1		1		0		0
2019-10-28	Regulus regulus	LK46802	m	1		6		1		0		0
2019-10-28	Regulus regulus	LK46803	m	1		5.5		1		0		0
2019-10-28	Regulus regulus	LK46805	m	1		5.6		1		0		0
2019-10-28	Regulus regulus	LK46806	m	1		5.1		1		0		0
2019-10-28	Regulus regulus	LK46807	f	1		5.6		1		0		0
2019-10-28	Regulus regulus	LK46808	f	1		5.4		1		0		0
2019-10-28	Regulus regulus	LK46809	m	1		6		1		0		0
2019-10-28	Regulus regulus	LK46810	m	1		5.6		1		0		0
2019-10-28	Regulus regulus	LK46811	m	1		5.2		1		0		0
2019-10-28	Regulus regulus	LK46812	m	1		5.8		1		0		0
2019-10-28	Regulus regulus	LK46815	m	1		5.7		1		0		0
2019-10-28	Regulus regulus	LK46816	f	1		5.4		1		0		0
2019-10-28	Regulus regulus	LK46817	m	1		6.3		1		0		0
2019-10-28	Regulus regulus	LK46818	f	1		5.3		1		0		0
2019-10-28	Regulus regulus	LK46819	m	1		5.4		1		0		0
2019-10-28	Regulus regulus	LK46820	f	1		5.6		1		0		0
2019-10-28	Regulus regulus	LK46821	m	1		6.3		1		0		0
2019-10-28	Regulus regulus	LK46823	f	2+		5.8		2		0		1
2019-10-28	Regulus regulus	LK46824	m	1		5.8		1		0		0
2019-10-28	Regulus regulus	LK46825	f	1		5.9		1		0		0
2019-10-28	Regulus regulus	LK46826	m	1		5.6		1		0		0
2019-10-28	Regulus regulus	LK46827	m	1		5.7		1		0		0
2019-10-28	Regulus regulus	LK46828	f	2+		5.4		3		1		0
2019-10-28	Regulus regulus	LK46829	f	1		5.3		1		0		0
2019-10-28	Regulus regulus	LK46830	f	1				1		0		0
2019-10-28	Regulus regulus	LK46831	m	1		5.6		1		0		0
2019-10-28	Regulus regulus	LK46832	f	1		5.2		1		0		0
2019-10-28	Regulus regulus	LK46833	f	1		5.1		1		0		0
2019-10-28	Regulus regulus	LK46834	m	1		5.7		1		0		0
2019-10-28	Regulus regulus	LK46835	m	1		5.7		1		0		0
2019-10-28	Regulus regulus	LK46836	f	2+		5.3		3		1		0
2019-10-28	Regulus regulus	LK46837	f	1		5.4		1		0		0
2019-10-28	Regulus regulus	LK46838	m	1		5.4		1		0		0
2019-10-28	Regulus regulus	LK46839	m	1		5.5		1		0		0
2019-10-28	Regulus regulus	LK46840	m	1		5.3		1		0		0
2019-10-28	Regulus regulus	LK46841	m	1		5.5		1		0		0
2019-10-28	Phylloscopus collybita	LK46842		1	61	7.5	0.122951	1	0	0		0
2019-10-28	Phylloscopus collybita	LK46843		1		6.7		1		0		0
2019-10-28	Phylloscopus collybita	LK46844		1		8.8		1		0		0
2019-10-28	Phylloscopus collybita	LK46845		2+	57	8	0.140351	2	0	0		0
2019-10-28	Phylloscopus collybita	LK46846		1		6.9		1		0		0
2019-10-28	Phylloscopus collybita	LK46847		2+	56	6.5	0.116071	2	0	0		0
2019-10-28	Phylloscopus collybita	LK46848		1		8.6		1		0		0
2019-10-28	Phylloscopus collybita	LK46849		1		8.1		1		0		0
2019-10-28	Troglodytes troglodytes	LK46850		1		10.1		1		0		0
2019-10-28	Troglodytes troglodytes	LK46851		1		9		1		0		0
2019-10-28	Regulus regulus	LK46852	m	2+				2		0		0
2019-10-28	Regulus regulus	LK46853	m	1				1		0		0
2019-10-28	Regulus regulus	LK46854	m	1				1		0		0
2019-10-28	Regulus regulus	LK46855	m	1				1		0		0
2019-10-28	Regulus regulus	LK46856	m	1				1		0		0
2019-10-28	Regulus regulus	LK46857	m	2+				2		0		1
2019-10-28	Regulus regulus	LK46858	m	1				1		0		0
2019-10-28	Regulus regulus	LK46859	f	2+		5.3		2		0		0
2019-10-28	Regulus regulus	LK46860	f	2+				3		1		0
2019-10-28	Regulus regulus	LK46861	f	1				1		0		0
2019-10-28	Regulus regulus	LK46862	f	1				1		0		0
2019-10-28	Regulus regulus	LK46863	f	1				1		0		0
2019-10-28	Regulus regulus	LK46864	m	1				1		0		0
2019-10-28	Regulus regulus	LK46865	m	1				1		0		0
2019-10-28	Regulus regulus	LK46866	f	1				1		0		0
2019-10-28	Regulus regulus	LK46867	m	2+				2		0		0
2019-10-28	Regulus regulus	LK46868	m	1				1		0		0
2019-10-28	Regulus regulus	LK46869	m	1				1		0		0
2019-10-28	Regulus regulus	LK46870	f	1				1		0		0
2019-10-28	Regulus regulus	LK46871	m	2+				2		0		0
2019-10-28	Regulus regulus	LK46872	m	1				1		0		0
2019-10-28	Regulus regulus	LK46873	m	1				1		0		0
2019-10-28	Regulus regulus	LK46874	m	1				1		0		1
2019-10-28	Regulus regulus	LK46875	m	1				1		0		0
2019-10-28	Regulus regulus	LK46876	f	1				1		0		0
2019-10-28	Regulus regulus	LK46877	f	1				1		0		0
2019-10-28	Regulus regulus	LK46878	m	1				1		0		0
2019-10-28	Regulus regulus	LK46879	m	1				1		0		0
2019-10-28	Regulus regulus	LK46880	m	1				1		0		1
2019-10-28	Regulus regulus	LK46881	m	1				1		0		1
2019-10-28	Regulus regulus	LK46882	m	1				1		0		1
2019-10-28	Regulus regulus	LK46883	m	1				1		0		0
2019-10-28	Regulus regulus	LK46884	m	1				1		0		0
2019-10-28	Regulus regulus	LK46885	m	1				3		1		1
2019-10-28	Regulus regulus	LK46886	m	1				1		0		0
2019-10-28	Regulus regulus	LK46887	m	1				1		0		0
2019-10-28	Regulus regulus	LK46888	f	2+				3		1		0
2019-10-28	Regulus regulus	LK46889	m	1				1		0		0
2019-10-28	Regulus regulus	LK46890	m	1				1		0		0
2019-10-28	Regulus regulus	LK46891	m	1				1		0		0
2019-10-28	Regulus regulus	LK46892	f	1				1		0		0
2019-10-28	Regulus regulus	LK46893	m	1				1		0		0
2019-10-28	Regulus regulus	LK46894	m	1				1		0		0
2019-10-28	Regulus regulus	LK46895	m	1				1		0		0
2019-10-28	Regulus regulus	LK46896	f	1				1		0		0
2019-10-28	Regulus regulus	LK46897	f	1				1		0		0
2019-10-28	Regulus regulus	LK46898	f	1				1		0		0
2019-10-28	Regulus regulus	LK46899	m	1				1		0		0
2019-10-28	Regulus regulus	LK46900	f	1				1		0		0
2019-10-28	Regulus regulus	LK46901	m	1				1		0		1
2019-10-28	Regulus regulus	LK46902	m	1				1		0		0
2019-10-28	Regulus regulus	LK46903	m	1				1		0		0
2019-10-28	Regulus regulus	LK46904	m	1				1		0		0
2019-10-28	Regulus regulus	LK46905	m	1				1		0		0
2019-10-28	Regulus regulus	LK46906	m	1				1		0		0
2019-10-28	Regulus regulus	LK46907	m	1				1		0		0
2019-10-28	Regulus regulus	LK46910	f	2+				2		0		1
2019-10-28	Phylloscopus collybita	LK46911		1				1		0		0
2019-10-28	Phylloscopus collybita	LK46912		2+				2		0		0
2019-10-28	Phylloscopus collybita	LK46913		1				1		0		1
2019-10-28	Phylloscopus collybita	LK46914		1	59	8.3	0.140678	1	0	0		0
2019-10-28	Phylloscopus collybita	LK46915		1	63	9.8	0.155556	1	0	0		0
2019-10-28	Phylloscopus collybita	LK46916		1	57	7.2	0.126316	1	0	0		0
2019-10-28	Phylloscopus collybita	LK46917		1	57	8.4	0.147368	1	0	0		0
2019-10-28	Phylloscopus collybita	LK46918		1		7.9		1		0		0
2019-10-28	Phylloscopus collybita	LK46919		1		8.1		1		0		0
2019-10-28	Phylloscopus collybita	LK46920		1	57	7.3	0.12807	1	0	0		0
2019-10-28	Phylloscopus collybita	LK46921		1	53	7.1	0.133962	1	0	0		0
2019-10-28	Regulus regulus	LK46922	m	1				1		0		0
2019-10-28	Regulus regulus	LK46923	f	1	50	5	0.1	1	0	0		0
2019-10-28	Regulus regulus	LK46925	f	1				1		0		1
2019-10-28	Regulus regulus	LK46926	f	1				1		0		0
2019-10-28	Regulus regulus	LK46927	m	2+				2		0		0
2019-10-28	Regulus regulus	LK46928	m	1				1		0		0
2019-10-28	Regulus regulus	LK46929	m	1				1		0		0
2019-10-28	Regulus regulus	LK46930	m	1	54	5.6	0.103704	1	0	0		0
2019-10-28	Regulus regulus	LK46931	m	1				1		0		0
2019-10-28	Regulus regulus	LK46932	f	1				1		0		0
2019-10-28	Regulus regulus	LK46933	m	1				1		0		0
2019-10-28	Regulus regulus	LK46934	f	1				1		0		1
2019-10-28	Regulus regulus	LK46935	m	1				1		0		1
2019-10-28	Regulus regulus	LK46936	m	1				1		0		0
2019-10-28	Regulus regulus	LK46937	m	1				1		0		0
2019-10-28	Regulus regulus	LK46938	m	1				1		0		0
2019-10-28	Regulus regulus	LK46939	m	1				1		0		0
2019-10-28	Regulus regulus	LK46940	m	1				1		0		0
2019-10-28	Regulus regulus	LK46941	m	1				1		0		0
2019-10-28	Regulus regulus	LK46942	m	1				1		0		0
2019-10-28	Regulus regulus	LK46943	m	1				1		0		0
2019-10-28	Regulus regulus	LK46944	f	1				1		0		0
2019-10-28	Regulus regulus	LK46946	m	1				1		0		1
2019-10-28	Regulus regulus	LK46947	m	1				1		0		0
2019-10-28	Regulus regulus	LK46948	f	1	53	5.2	0.0981132	1	0	0		0
2019-10-28	Regulus regulus	LK46950	m	1				1		0		0
2019-10-28	Regulus regulus	LK46951	m	1	54	5.4	0.1	1	0	0		0
2019-10-28	Regulus regulus	LK46952	f	1				1		0		0
2019-10-28	Regulus regulus	LK46953	m	1	54	5.7	0.105556	1	0	0		0
2019-10-28	Regulus regulus	LK46956	m	1	54	5.3	0.0981481	1	0	0		0
2019-10-28	Regulus regulus	LK46957	f	1				1		0		0
2019-10-28	Regulus regulus	LK46958	m	1				1		0		1
2019-10-28	Regulus regulus	LK46959	m	1	54	6	0.111111	1	0	0		0
2019-10-28	Regulus regulus	LK46960	m	2+				2		0		1
2019-10-28	Regulus regulus	LK46961	f	1	51	5.2	0.101961	1	0	0		0
2019-10-28	Regulus regulus	LK46963	m	1	54	5.9	0.109259	1	0	0		0
2019-10-28	Regulus regulus	LK46965	m	1				1		0		1
2019-10-28	Regulus regulus	LK46970	f	1				1		0		0
2019-10-28	Regulus regulus	LK46971	m	1				1		0		0
2019-10-28	Regulus regulus	LK46972	f	1				1		0		0
2019-10-28	Regulus regulus	LK46973	m	2+				2		0		0
2019-10-28	Regulus regulus	LK46975	f	1				1		0		0
2019-10-28	Regulus regulus	LK46976	m	1				1		0		0
2019-10-28	Regulus regulus	LK46977	m	1				1		0		0
2019-10-28	Regulus regulus	LK46978	m	1				1		0		0
2019-10-28	Regulus regulus	LK46979		1				1		0		0
2019-10-28	Regulus regulus	LK46980	f	1				1		0		1
2019-10-28	Regulus regulus	LK46981	f	1				1		0		0
2019-10-28	Regulus regulus	LK46982	m	1				1		0		0
2019-10-28	Regulus regulus	LK46983	m	1				1		0		0
2019-10-28	Regulus regulus	LK46984	m	2+				2		0		0
2019-10-28	Regulus regulus	LK46985	m	1				1		0		0
2019-10-28	Regulus regulus	LK46986	m	1				1		0		0
2019-10-28	Regulus regulus	LK46987	m	1				1		0		0
2019-10-28	Regulus regulus	LK46988	m	1				1		0		0
2019-10-28	Regulus regulus	LK46989	m	1				1		0		0
2019-10-28	Regulus regulus	LK46990	m	1				1		0		0
2019-10-28	Regulus regulus	LK46991	f	1				1		0		0
2019-10-28	Regulus regulus	LK46992	f	1				1		0		0
2019-10-28	Regulus regulus	LK46993	m	1				1		0		0
2019-10-28	Regulus regulus	LK46994	f	1				1		0		0
2019-10-28	Regulus regulus	LK46995	m	1				1		0		0
2019-10-28	Regulus regulus	LK46996	m	1				1		0		0
2019-10-28	Regulus regulus	LK46997	m	1				1		0		0
2019-10-28	Regulus regulus	LK46998	f	1				1		0		0
2019-10-28	Regulus regulus	LK46999	f	1				1		0		0
2019-10-28	Regulus regulus	LK47000	m	1				1		0		1
2019-10-28	Regulus regulus	LK47001	m	1				1		0		0
2019-10-28	Regulus regulus	LK47002	m	1				1		0		0
2019-10-28	Troglodytes troglodytes	LK47003		1				1		0		0
2019-10-28	Regulus regulus	LK47005	f	1				1		0		0
2019-10-28	Regulus regulus	LK47007	f	1				1		0		0
2019-10-28	Regulus regulus	LK47008	f	1				1		0		1
2019-10-28	Regulus regulus	LK47009	m	1	54	4.9	0.0907407	1	0	0		1
2019-10-28	Regulus regulus	LK47020	m	2+				2		0		1
2019-10-28	Regulus regulus	LK47041	m	2+				2		0		1
2019-10-28	Regulus regulus	LK47043	m	1				1		0		1
2019-10-28	Phylloscopus collybita	LK47060		1				1		0		0
2019-10-28	Phylloscopus collybita	LK47061		1				1		0		0
2019-10-28	Phylloscopus collybita	LK47062		1				1		0		1
2019-10-28	Phylloscopus collybita	LK47063		1				1		0		0
2019-10-28	Phylloscopus collybita	LK47065		1	60	8.3	0.138333	1	0	0		1
2019-10-28	Phylloscopus collybita	LK47066		1	56	7.5	0.133929	1	0	0		0
2019-10-28	Certhia familiaris	LK47068		1	65	9.7	0.149231	1	0	0		0
2019-10-28	Regulus regulus	LK47069	m	1	53	5.8	0.109434	1	0	0		1
2019-10-28	Regulus regulus	LK47070	f	1	51	5.3	0.103922	1	0	0		0
2019-10-28	Regulus regulus	LK47071	f	1	52	5.5	0.105769	1	0	0		1
2019-10-28	Regulus regulus	LK47072	m	1	54	6	0.111111	1	0	0		1
2019-10-28	Regulus regulus	LK47073	m	2+	54	5.4	0.1	2	0	0		0
2019-10-28	Regulus regulus	LK47074	m	1	52	6.1	0.117308	1	0	0		0
2019-10-28	Regulus regulus	LK47075	m	1				1		0		1
2019-10-28	Regulus regulus	LK47076	f	1	51	4.9	0.0960784	1	0	0		0
2019-10-28	Regulus regulus	LK47077	f	1				1		0		1
2019-10-28	Regulus regulus	LK47078	m	1	52	6.2	0.119231	1	0	0		0
2019-10-28	Regulus regulus	LK47079	m	2+		5.3		2		0		0
2019-10-28	Regulus regulus	LK47080	m	1	53	5.6	0.10566	1	0	0		0
2019-10-28	Regulus regulus	LK47081	m	1	53	6.1	0.115094	3	1	1		0
2019-10-28	Regulus regulus	LK47082	m	1	55	6.4	0.116364	1	0	0		0
2019-10-28	Regulus regulus	LK47083	m	1	55	6.4	0.116364	1	0	0		1
2019-10-28	Regulus regulus	LK47084	m	1		5.2		3		1		0
2019-10-28	Regulus regulus	LK47085	f	1	53	5.6	0.10566	1	0	0		0
2019-10-28	Regulus regulus	LK47086	m	2+		5.1		2		0		0
2019-10-28	Regulus regulus	LK47087	m	1	54	5.6	0.103704	1	0	0		1
2019-10-28	Regulus regulus	LK47088	m	1		5.6		1		0		0
2019-10-28	Regulus regulus	LK47089	f	1		6		1		0		0
2019-10-28	Regulus regulus	LK47090	f	1	50	5.5	0.11	1	0	0		0
2019-10-28	Regulus regulus	LK47091	m	1	55	5.8	0.105455	1	0	0		0
2019-10-28	Regulus regulus	LK47092	m	1	54	5	0.0925926	1	0	0		0
2019-10-28	Regulus regulus	LK47093	m	2+		5		2		0		0
2019-10-28	Regulus regulus	LK47094	m	1	55	5.9	0.107273	1	0	0		0
2019-10-28	Regulus regulus	LK47095	m	1	53	5.2	0.0981132	1	0	0		0
2019-10-28	Regulus regulus	LK47097	m	1	53	5.2	0.0981132	1	0	0		0
2019-10-28	Regulus regulus	LK47098	m	1	54	5.8	0.107407	1	0	0		0
2019-10-28	Regulus regulus	LK47099	m	1		5.6		1		0		0
2019-10-28	Regulus regulus	LK47100	m	1	55	5.5	0.1	1	0	0		1
2019-10-28	Regulus regulus	LK47101	f	1		5.3		1		0		0
2019-10-28	Regulus regulus	LK47102	m	2+	55	5.1	0.0927273	2	0	0		0
2019-10-28	Regulus regulus	LK47103	f	1	52	6	0.115385	1	0	0		0
2019-10-28	Aegithalos caudatus	LK47107		1	66	8	0.121212	1	0	0		1
2019-10-28	Aegithalos caudatus	LK47109		1	61	7.9	0.129508	1	0	0		0
2019-10-28	Aegithalos caudatus	LK47113		1	62	8	0.129032	1	0	0		0
2019-10-28	Phylloscopus collybita	LK47119		1	58	7.6	0.131034	1	0	0		0
2019-10-28	Regulus regulus	LK47121	m	2+	54	6	0.111111	3	1	1		1
2019-10-28	Regulus regulus	LK47122	m	1		5.5		1		0		1
2019-10-28	Regulus regulus	LK47123	f	1	52	5.4	0.103846	1	0	0		0
2019-10-28	Regulus regulus	LK47125	m	1	55	6	0.109091	1	0	0		1
2019-10-28	Regulus regulus	LK47126	f	1		5.4		1		0		1
2019-10-28	Regulus regulus	LK47127	f	2+	53	5.6	0.10566	2	0	0		0
2019-10-28	Regulus regulus	LK47128	m	1	54	5.6	0.103704	1	0	0		0
2019-10-28	Regulus regulus	LK47129	f	1		5.3		1		0		1
2019-10-28	Regulus regulus	LK47130	m	1	54	5.8	0.107407	1	0	0		0
2019-10-28	Regulus regulus	LK47131	f	1		5.7		1		0		1
2019-10-28	Regulus regulus	LK47133	m	1	54	5.6	0.103704	1	0	0		0
2019-10-28	Regulus regulus	LK47134	m	1		5.7		1		0		0
2019-10-28	Regulus regulus	LK47135	f	1		5.1		1		0		0
2019-10-28	Aegithalos caudatus	LK47140		1	63	8.6	0.136508	1	0	0		1
2019-10-28	Aegithalos caudatus	LK47142		1		8.6		1		0		1
2019-10-28	Aegithalos caudatus	LK47145		1	63			1		0		1
2019-10-28	Phylloscopus collybita	LK47154		1	65	10.4	0.16	1	0	0		0
2019-10-28	Regulus regulus	LK47155	f	1	51	5.6	0.109804	1	0	0		1
2019-10-28	Regulus regulus	LK47156	f	1	52	5.3	0.101923	1	0	0		0
2019-10-28	Regulus regulus	LK47157	f	1	52	4.8	0.0923077	1	0	0		1
2019-10-28	Regulus regulus	LK47158	m	1	55	5.1	0.0927273	1	0	0		1
2019-10-28	Regulus regulus	LK47159	m	1	53	5.9	0.111321	1	0	0		0
2019-10-28	Regulus regulus	LK47160	m	1	54	5.6	0.103704	1	0	0		1
2019-10-28	Regulus regulus	LK47162	m	1	53	5.8	0.109434	1	0	0		0
2019-10-28	Regulus regulus	LK47163	m	1	54	5.4	0.1	1	0	0		0
2019-10-28	Aegithalos caudatus	LK47164		1	62	8.5	0.137097	1	0	0		0
2019-10-28	Regulus regulus	LK47166	f	1		6.2		1		0		1
2019-10-28	Regulus regulus	LK47167	m	1	54	6.4	0.118519	1	0	0		0
2019-10-28	Regulus regulus	LK47168	f	2+	50	5.8	0.116	3	1	1		0
2019-10-28	Regulus regulus	LK47169	m	1	53	5.3	0.1	1	0	0		1
2019-10-28	Regulus regulus	LK47170	m	1	53	6	0.113208	1	0	0		0
2019-10-28	Regulus regulus	LK47171	m	2+	54	6.2	0.114815	2	0	0		0
2019-10-28	Regulus regulus	LK47172	f	1	51	5.3	0.103922	1	0	0		0
2019-10-28	Regulus regulus	LK47173	m	1		5.8		1		0		0
2019-10-28	Troglodytes troglodytes	LK47175		1	46	9.5	0.206522	1	0	0		0
2019-10-28	Aegithalos caudatus	LK47183		1		8.6		1		0		0
2019-10-28	Phylloscopus collybita	LK47191		1	56	8.4	0.15	1	0	0		0
2019-10-28	Regulus regulus	LK47192	m	2+	54	5.6	0.103704	3	1	1		0
2019-10-28	Regulus regulus	LK47193	f	1	51	5.3	0.103922	1	0	0		0
2019-10-28	Regulus regulus	LK47194	m	1	54	5.9	0.109259	1	0	0		0
2019-10-28	Regulus regulus	LK47195	m	1	52	5.6	0.107692	1	0	0		0
2019-10-28	Regulus regulus	LK47196	m	1	53	5.3	0.1	1	0	0		1
2019-10-28	Regulus regulus	LK47197	f	1	52	5.9	0.113462	1	0	0		0
2019-10-28	Regulus regulus	LK47198	f	2+	51	5.5	0.107843	2	0	0		1
2019-10-28	Regulus regulus	LK47199	f	1	53	5.5	0.103774	1	0	0		0
2019-10-28	Regulus regulus	LK47200	m	2+	55	6.2	0.112727	2	0	0		0
2019-10-28	Regulus regulus	LK47201	f	1	50	4.9	0.098	1	0	0		0
2019-10-28	Regulus regulus	LK47202	m	1	54	6	0.111111	1	0	0		0
2019-10-28	Regulus regulus	LK47203	f	1	53	5.4	0.101887	1	0	0		0
2019-10-28	Regulus regulus	LK47204	f	1	50	5	0.1	1	0	0		0
2019-10-28	Regulus regulus	LK47205	m	1	54	5.9	0.109259	1	0	0		0
2019-10-28	Regulus regulus	LK47206	m	1	54	5.6	0.103704	1	0	0		0
2019-10-28	Troglodytes troglodytes	LK47207		1	50	10.6	0.212	1	0	0		0
2019-10-28	Regulus regulus	LK47209	f	2+	53	5.8	0.109434	2	0	0		0
2019-10-28	Regulus regulus	LK47210	f	2+	50	6	0.12	2	0	0		0
2019-10-28	Regulus regulus	LK47211	m	1	55	5.6	0.101818	1	0	0		0
2019-10-28	Regulus regulus	LK47212	m	2+	53	5.8	0.109434	2	0	0		1
2019-10-28	Regulus regulus	LK47213	m	1	56	5.9	0.105357	1	0	0		0
2019-10-28	Troglodytes troglodytes	LK47214		1	47	9.9	0.210638	1	0	0		0
2019-10-28	Regulus regulus	LK47215	m	1	56	5.8	0.103571	1	0	0		0
2019-10-28	Aegithalos caudatus	LK47217		1	63	8.2	0.130159	1	0	0		1
2019-10-28	Troglodytes troglodytes	LK47221		1	47	10.3	0.219149	1	0	0		1
2019-10-28	Troglodytes troglodytes	LK47222		1	46	9.5	0.206522	1	0	0		0
2019-10-28	Troglodytes troglodytes	LK47223		1	50	9.4	0.188	1	0	0		0
2019-10-28	Troglodytes troglodytes	LK47224		1	48	10.3	0.214583	1	0	0		0
2019-10-28	Regulus regulus	TZ5097	m	1	52	5	0.0961538	1	0	0		1
2019-10-29	Turdus merula	HJ16710	f	2+		80.5		2		0		0
2019-10-29	Turdus merula	HJ16711	m	2+	133	101.5	0.763158	2	0	0		0
2019-10-29	Turdus merula	HJ16712	f	1	127	82.7	0.651181	1	0	0		0
2019-10-29	Turdus merula	HJ16713	f	1	123	88.8	0.721951	1	0	0		0
2019-10-29	Turdus merula	HJ16714	m	1	130	90.7	0.697692	1	0	0		0
2019-10-29	Turdus merula	HJ16715	f	1	127	82.3	0.648031	1	0	0		0
2019-10-29	Turdus merula	HJ16716	f	1	126	83.3	0.661111	1	0	0		0
2019-10-29	Turdus merula	HJ16717	f	2+	125	84.9	0.6792	2	0	0		0
2019-10-29	Turdus merula	HJ16718	f	1	131	94.7	0.722901	1	0	0		0
2019-10-29	Turdus merula	HJ16719	f	1	127	86.3	0.679528	1	0	0		0
2019-10-29	Turdus merula	HJ16720	f	1	130	86.6	0.666154	1	0	0		0
2019-10-29	Turdus merula	HJ16721	f	1	129	97.4	0.755039	1	0	0		0
2019-10-29	Turdus merula	HJ16722	f	2+	127	85.4	0.672441	3	1	1		0
2019-10-29	Turdus merula	HJ16723	f	1	127	197.8	1.55748	1	0	0		0
2019-10-29	Turdus merula	HJ16724	f	2+		91.2		2		0		0
2019-10-29	Turdus merula	HJ16725	m	2+		104.2		2		0		0
2019-10-29	Erithacus rubecula	K9Z1641		1		17.7		1		0		0
2019-10-29	Erithacus rubecula	K9Z1928		2+	72	17.3	0.240278	2	0	0		0
2019-10-29	Erithacus rubecula	K9Z1930		1	71	16.4	0.230986	1	0	0		0
2019-10-29	Erithacus rubecula	K9Z1931		1		13.6		1		0		0
2019-10-29	Erithacus rubecula	K9Z1932		2+	73	16.1	0.220548	3	1	1		1
2019-10-29	Erithacus rubecula	K9Z1933	f	1	70	15.1	0.215714	1	0	0		0
2019-10-29	Erithacus rubecula	K9Z1934		2+	74	15.7	0.212162	2	0	0		0
2019-10-29	Erithacus rubecula	K9Z1935		1		14.6		1		0		0
2019-10-29	Cyanistes caeruleus	K9Z1936	f	2+	65	10.6	0.163077	3	1	1		0
2019-10-29	Cyanistes caeruleus	K9Z1937	m	1	66	10.6	0.160606	1	0	0		0
2019-10-29	Parus major	K9Z1938	f	1	73	16.2	0.221918	1	0	0		0
2019-10-29	Erithacus rubecula	K9Z1939		1	71	15.9	0.223944	1	0	0		0
2019-10-29	Erithacus rubecula	K9Z1941		1	73	17.6	0.241096	1	0	0		0
2019-10-29	Erithacus rubecula	K9Z1942		1	72	17.4	0.241667	1	0	0		0
2019-10-29	Erithacus rubecula	K9Z1943	f	1	70	18.4	0.262857	1	0	0		0
2019-10-29	Erithacus rubecula	K9Z1944		1	73	17.3	0.236986	1	0	0		0
2019-10-29	Erithacus rubecula	K9Z1945		2+	72	18.1	0.251389	2	0	0		0
2019-10-29	Aegithalos caudatus	LK13924		1	63	8.4	0.133333	1	0	0		0
2019-10-29	Aegithalos caudatus	LK13939		1	61	8.3	0.136066	1	0	0		1
2019-10-29	Aegithalos caudatus	LK45765		1		9		1		0		0
2019-10-29	Regulus regulus	LK47010	m	1		5.4		1		0		0
2019-10-29	Regulus regulus	LK47131	f	1		5.5		1		0		0
2019-10-29	Aegithalos caudatus	LK47217		1		7.7		1		0		1
2019-10-29	Troglodytes troglodytes	LK47225		1	46	8.3	0.180435	1	0	0		0
2019-10-29	Troglodytes troglodytes	LK47226		2+	47	9.1	0.193617	3	1	1		0
2019-10-29	Troglodytes troglodytes	LK47227		1	48	9.4	0.195833	1	0	0		0
2019-10-29	Troglodytes troglodytes	LK47228		1	49	9.6	0.195918	1	0	0		0
2019-10-29	Regulus regulus	LK47229	m	1	54	5.5	0.101852	1	0	0		0
2019-10-29	Phylloscopus collybita	LK47230		1	55	8.5	0.154545	1	0	0		0
2019-10-29	Troglodytes troglodytes	LK47231		1	47	8.8	0.187234	1	0	0		0
2019-10-29	Troglodytes troglodytes	LK47232		1	50	10.4	0.208	1	0	0		0
2019-10-29	Troglodytes troglodytes	LK47233		1	49	9.1	0.185714	1	0	0		0
2019-10-29	Regulus regulus	LK47234	m	1	52	4.8	0.0923077	1	0	0		1
2019-10-29	Regulus regulus	LK47235	m	1	55	5	0.0909091	1	0	0		0
2019-10-29	Regulus regulus	LK47236	f	2+	51			3		1		0
2019-10-29	Regulus regulus	LK47237	m	1	53	5.8	0.109434	1	0	0		0
2019-10-29	Regulus regulus	LK47238	f	1	52	5.1	0.0980769	1	0	0		0
2019-10-29	Regulus regulus	LK47239	f	1	51	5.1	0.1	1	0	0		0
2019-10-29	Regulus regulus	LK47240	f	1	52	4.8	0.0923077	1	0	0		0
2019-10-29	Regulus regulus	LK47241	m	1	53	5.1	0.0962264	1	0	0		0
2019-10-29	Regulus regulus	LK47242	f	1	51	5.6	0.109804	1	0	0		0
2019-10-29	Regulus regulus	LK47243	f	1		4.8		1		0		0
2019-10-29	Regulus regulus	LK47244	m	2+	55	5.1	0.0927273	2	0	0		0
2019-10-29	Regulus regulus	LK47245	m	2+	55	5.1	0.0927273	2	0	0		0
2019-10-29	Regulus regulus	LK47246	m	1	53	5.6	0.10566	1	0	0		0
2019-10-29	Regulus regulus	LK47247	m	1	55	4.9	0.0890909	1	0	0		1
2019-10-29	Regulus regulus	LK47251	f	1	52	5.4	0.103846	1	0	0		0
2019-10-29	Regulus regulus	LK47252	m	1	54	4.6	0.0851852	1	0	0		0
2019-10-29	Regulus regulus	LK47253	f	1	53	5.3	0.1	1	0	0		0
2019-10-29	Regulus regulus	LK47254	m	1	54	5.5	0.101852	1	0	0		0
2019-10-29	Regulus regulus	LK47255	m	2+	52	4.7	0.0903846	2	0	0		0
2019-10-29	Regulus regulus	LK47258	m	2+	54	5.5	0.101852	2	0	0		0
2019-10-29	Regulus regulus	LK47259	m	1	53	4.9	0.0924528	1	0	0		0
2019-10-29	Regulus regulus	LK47260	f	1	53	5.6	0.10566	1	0	0		1
2019-10-29	Regulus regulus	LK47262	f	1		5.6		1		0		0
2019-10-29	Regulus regulus	LK47263	m	1	53	5.5	0.103774	1	0	0		0
2019-10-29	Regulus regulus	LK47264	m	1	56	4.9	0.0875	1	0	0		0
2019-10-29	Regulus regulus	LK47265	m	1	53	5.3	0.1	1	0	0		0
2019-10-29	Regulus regulus	LK47266	f	1	52	5.2	0.1	1	0	0		0
2019-10-29	Regulus regulus	LK47267	f	1	53	5	0.0943396	1	0	0		0
2019-10-29	Regulus regulus	LK47268	m	1	54	4.9	0.0907407	1	0	0		0
2019-10-29	Regulus regulus	LK47269	m	1	53	5.4	0.101887	1	0	0		0
2019-10-29	Regulus regulus	LK47270	m	1	54	5	0.0925926	1	0	0		0
2019-10-29	Regulus regulus	LK47271	f	1	51	5.6	0.109804	1	0	0		0
2019-10-29	Regulus regulus	LK47272	f	1	50	4.9	0.098	1	0	0		0
2019-10-29	Regulus regulus	LK47273	m	1	54	5.6	0.103704	1	0	0		0
2019-10-29	Aegithalos caudatus	LK47288		1	62	8.1	0.130645	1	0	0		1
2019-10-29	Aegithalos caudatus	LK47292		1	63	8.1	0.128571	1	0	0		1
2019-10-29	Aegithalos caudatus	LK47296		1	61	7.6	0.12459	1	0	0		0
2019-10-29	Certhia familiaris	LK47297		1	66	9.3	0.140909	1	0	0		0
2019-10-29	Certhia familiaris	LK47306		1	69	9.4	0.136232	1	0	0		0
2019-10-29	Regulus regulus	LK47316	f	1	52	5.7	0.109615	1	0	0		0
2019-10-29	Regulus regulus	LK47317	f	1	52	5.4	0.103846	1	0	0		0
2019-10-29	Regulus regulus	LK47318	m	1	53	5.4	0.101887	1	0	0		1
2019-10-29	Regulus regulus	LK47319	f	1	52	5.4	0.103846	1	0	0		0
2019-10-29	Regulus regulus	LK47320	m	1	54	5.4	0.1	1	0	0		1
2019-10-29	Troglodytes troglodytes	LK47321		1	45	10.6	0.235556	1	0	0		0
2019-10-30	Turdus merula	HJ16726	f	1	129	83.3	0.645736	1	0	0		0
2019-10-30	Turdus merula	HJ16727	m	1	138	93.9	0.680435	1	0	0		0
2019-10-30	Cyanistes caeruleus	K2V5591	m	2+	69	11	0.15942	2	0	0		1
2019-10-30	Cyanistes caeruleus	K3N8942	f	2+	64	10.3	0.160938	2	0	0		1
2019-10-30	Cyanistes caeruleus	K7T7596	m	1	67	11.1	0.165672	1	0	0		0
2019-10-30	Cyanistes caeruleus	K7T7605	f	1	62	10.2	0.164516	3	1	1		1
2019-10-30	Parus major	K7T7613	f	1		17.7		1		0		0
2019-10-30	Cyanistes caeruleus	K9Z1218	m	1	67	10.9	0.162687	1	0	0		1
2019-10-30	Erithacus rubecula	K9Z1931		1		13.2		1		0		1
2019-10-30	Parus major	K9Z1947	f	2+	74	16.1	0.217568	3	1	1		0
2019-10-30	Parus major	K9Z1948	m	1	77	18	0.233766	1	0	0		0
2019-10-30	Erithacus rubecula	K9Z1949	f	1	70			1		0		1
2019-10-30	Cyanistes caeruleus	K9Z1950	m	1	66	10.5	0.159091	1	0	0		1
2019-10-30	Cyanistes caeruleus	K9Z1952	f	2+	66	10.2	0.154545	2	0	0		0
2019-10-30	Erithacus rubecula	K9Z1953		1	72	14.3	0.198611	1	0	0		0
2019-10-30	Erithacus rubecula	K9Z1954	f	1	69	17.1	0.247826	1	0	0		0
2019-10-30	Erithacus rubecula	K9Z1956	m	1	75	15.1	0.201333	1	0	0		1
2019-10-30	Cyanistes caeruleus	K9Z1957	m	1	67	11.3	0.168657	1	0	0		0
2019-10-30	Troglodytes troglodytes	LK40379		1	48	9	0.1875	1	0	0		0
2019-10-30	Regulus regulus	LK47201	f	1		4.7		1		0		0
2019-10-30	Troglodytes troglodytes	LK47232		1		11.1		1		0		1
2019-10-30	Regulus regulus	LK47268	m	1		5.3		1		0		0
2019-10-30	Troglodytes troglodytes	LK47322		1	49	9.6	0.195918	1	0	0		0
2019-10-30	Troglodytes troglodytes	LK47325		1	45	8.6	0.191111	1	0	0		0
2019-10-30	Troglodytes troglodytes	LK47326		1	48	9.4	0.195833	1	0	0		0
2019-10-30	Regulus regulus	LK47327	m	1	53	4.9	0.0924528	1	0	0		1
2019-10-30	Regulus regulus	LK47328	m	1	52	5.4	0.103846	1	0	0		0
2019-10-30	Regulus regulus	LK47330	m	1	53	5.3	0.1	1	0	0		0
2019-10-30	Regulus regulus	LK47331	m	1	54	5.3	0.0981481	1	0	0		0
2019-10-30	Regulus regulus	LK47332	m	1	55	4.9	0.0890909	1	0	0		0
2019-10-30	Regulus regulus	LK47333	f	1	52	4.9	0.0942308	1	0	0		0
2019-10-30	Regulus regulus	LK47334	f	1	50	4.7	0.094	1	0	0		0
2019-10-30	Regulus regulus	LK47335	f	1		4.3		1		0		0
2019-10-30	Regulus regulus	LK47336	f	1	53	4.6	0.0867925	1	0	0		0
2019-10-30	Regulus regulus	LK47337	f	1	51	4.9	0.0960784	1	0	0		0
2019-10-30	Regulus regulus	LK47338	m	1	54	5.2	0.0962963	1	0	0		0
2019-10-30	Aegithalos caudatus	LK47342		1	63	7.6	0.120635	1	0	0		0
2019-10-30	Aegithalos caudatus	LK47344		1	64	7.9	0.123438	1	0	0		0
2019-10-30	Aegithalos caudatus	LK47348		1		7.8		1		0		1
2019-10-30	Aegithalos caudatus	LK47351		1	64	8.2	0.128125	1	0	0		0
2019-10-30	Aegithalos caudatus	LK47355		1	64	8.2	0.128125	1	0	0		1
2019-10-30	Aegithalos caudatus	LK47357		1	65	7.6	0.116923	1	0	0		1
2019-10-30	Aegithalos caudatus	LK47361		1	62	8	0.129032	3	1	1		0
2019-10-30	Aegithalos caudatus	LK47365		1	63	7.8	0.12381	1	0	0		1
2019-10-30	Aegithalos caudatus	LK47366		1	64	8.3	0.129688	1	0	0		0
2019-10-30	Regulus regulus	LK47368	m	1	55	5.8	0.105455	1	0	0		0
2019-10-30	Regulus regulus	LK47369	f	1	51	5.7	0.111765	1	0	0		0
2019-10-30	Regulus regulus	LK47370	m	1	54	5.5	0.101852	1	0	0		0
2019-10-30	Regulus regulus	LK47371	m	1	52	4.7	0.0903846	1	0	0		0
2019-10-30	Regulus regulus	LK47372	m	1	55	5.5	0.1	1	0	0		0
2019-10-30	Regulus regulus	LK47373	f	1	52	5.1	0.0980769	3	1	1		0
2019-10-30	Aegithalos caudatus	LK47375		1	64	8	0.125	1	0	0		1
2019-10-30	Aegithalos caudatus	LK47376		1	63	8	0.126984	1	0	0		1
2019-10-30	Aegithalos caudatus	LK47377		1	62	7.7	0.124194	1	0	0		1
2019-10-30	Aegithalos caudatus	LK47378		1	63	7.8	0.12381	1	0	0		0
2019-10-30	Regulus regulus	LK47383	m	1	55	5.1	0.0927273	1	0	0		0
2019-10-30	Regulus regulus	LK47384	m	1	55	5.8	0.105455	1	0	0		0
2019-10-31	Turdus merula	HJ16571	m	1		87.9		1		0		1
2019-10-31	Turdus merula	HJ16728	m	1	132	88.3	0.668939	1	0	0		0
2019-10-31	Turdus merula	HJ16729	f	1	128	79.9	0.624219	1	0	0		0
2019-10-31	Turdus merula	HJ16730	f	1	131	84.2	0.642748	1	0	0		0
2019-10-31	Turdus merula	HJ16731	f	1	125	80.5	0.644	1	0	0		0
2019-10-31	Turdus merula	HJ16732	f	1	129	88.4	0.685271	1	0	0		0
2019-10-31	Turdus merula	HJ16733	f	1	127	77.6	0.611024	1	0	0		0
2019-10-31	Turdus merula	HJ16734	f	1	127	90	0.708661	3	1	1		0
2019-10-31	Turdus merula	HJ16735	m	1	136	95.3	0.700735	3	1	1		1
2019-10-31	Turdus merula	HJ16736	f	1		80.3		1		0		0
2019-10-31	Turdus merula	HJ16737	f	1		89.8		1		0		0
2019-10-31	Turdus merula	HJ16738	f	1	131	90.8	0.69313	1	0	0		0
2019-10-31	Turdus merula	HJ16739	f	1	127	107.8	0.848819	1	0	0		0
2019-10-31	Turdus merula	HJ16740	m	1		91.2		1		0		0
2019-10-31	Turdus merula	HJ16741	m	2+		104.2		2		0		0
2019-10-31	Cyanistes caeruleus	K7T7668	m	1	66	11.3	0.171212	1	0	0		0
2019-10-31	Parus major	K9Z1213	f	1		17.7		1		0		0
2019-10-31	Erithacus rubecula	K9Z1935		1		14.6		1		0		0
2019-10-31	Erithacus rubecula	K9Z1959		1	74	15.9	0.214865	1	0	0		0
2019-10-31	Erithacus rubecula	K9Z1960	f	2+	69	13.6	0.197101	2	0	0		0
2019-10-31	Erithacus rubecula	K9Z1961		1	72	15.5	0.215278	1	0	0		0
2019-10-31	Parus major	K9Z1962	m	1	76	17.6	0.231579	1	0	0		0
2019-10-31	Parus major	K9Z1963	m	1	76	18.6	0.244737	1	0	0		0
2019-10-31	Erithacus rubecula	K9Z1964		1	71	16.5	0.232394	1	0	0		0
2019-10-31	Certhia familiaris	LK39554		1	61	8.2	0.134426	1	0	0		0
2019-10-31	Regulus regulus	LK47247	m	1		5.1		1		0		1
2019-10-31	Regulus regulus	LK47383	m	1		5.1		1		0		0
2019-10-31	Troglodytes troglodytes	LK47386		1	53			1		0		0
2019-10-31	Troglodytes troglodytes	LK47387		1	48	9.2	0.191667	1	0	0		0
2019-10-31	Regulus regulus	LK47388	m	1	54	6	0.111111	1	0	0		0
2019-10-31	Regulus regulus	LK47390	m	2+	51	5.1	0.1	2	0	0		0
2019-10-31	Regulus regulus	LK47392	m	1	55	5.5	0.1	1	0	0		0
2019-10-31	Regulus regulus	LK47393	m	1	54	5.2	0.0962963	1	0	0		0
2019-10-31	Regulus regulus	LK47394	m	1	52	5	0.0961538	1	0	0		0
2019-10-31	Regulus regulus	LK47395	m	1	53	5.5	0.103774	1	0	0		0
2019-10-31	Certhia familiaris	LK47396		1	62	8.6	0.13871	1	0	0		0
2019-10-31	Regulus regulus	LK47397	f	1	50	4.9	0.098	1	0	0		0
2019-10-31	Regulus regulus	LK47398	m	1	55	5.6	0.101818	1	0	0		0
2019-10-31	Troglodytes troglodytes	LK47399		1		9		1		0		0
2019-11-01	Turdus merula	HJ16705	f	1		82.9		1		0		0
2019-11-01	Turdus merula	HJ16742	m	1	132	88.3	0.668939	1	0	0		0
2019-11-01	Turdus merula	HJ16743	f	2+	130	85.7	0.659231	2	0	0		0
2019-11-01	Turdus merula	HJ16744	f	1	125	84.3	0.6744	1	0	0		0
2019-11-01	Turdus merula	HJ16745	f	2+	131	91.5	0.698473	2	0	0		0
2019-11-01	Turdus merula	HJ16746	f	1	124	78.7	0.634677	1	0	0		0
2019-11-01	Turdus merula	HJ16747	f	1	126	81.7	0.648413	1	0	0		0
2019-11-01	Turdus merula	HJ16748	f	1	129	95	0.736434	1	0	0		0
2019-11-01	Turdus merula	HJ16749	f	1	125	89.3	0.7144	1	0	0		0
2019-11-01	Turdus merula	HJ16750	m	1	127	83.8	0.659843	1	0	0		0
2019-11-01	Turdus merula	HJ16751	m	1	130	88.7	0.682308	1	0	0		0
2019-11-01	Turdus merula	HJ16752	f	1	127	89.5	0.704724	1	0	0		0
2019-11-01	Turdus merula	HJ16753	m	1	132	95.5	0.723485	1	0	0		0
2019-11-01	Turdus merula	HJ16754	f	1	127	83.9	0.66063	1	0	0		0
2019-11-01	Turdus merula	HJ16755	m	1	130	88.5	0.680769	1	0	0		0
2019-11-01	Turdus merula	HJ16756	f	1	125	88	0.704	1	0	0		0
2019-11-01	Turdus merula	HJ16757	f	1	130	84.2	0.647692	1	0	0		0
2019-11-01	Turdus merula	HJ16758	f	2+	128	82	0.640625	2	0	0		0
2019-11-01	Turdus merula	HJ16759	m	1	133	93.9	0.706015	1	0	0		0
2019-11-01	Turdus merula	HJ16760	m	1	136	96	0.705882	1	0	0		0
2019-11-01	Parus major	K7T8270	m	2+		19.2		2		0		1
2019-11-01	Erithacus rubecula	K9Z1956		1		14.2		1		0		0
2019-11-01	Erithacus rubecula	K9Z1964		1		15.6		1		0		0
2019-11-01	Erithacus rubecula	K9Z1965		1	73	16.8	0.230137	1	0	0		1
2019-11-01	Cyanistes caeruleus	K9Z1966	f	1	63	10.6	0.168254	1	0	0		1
2019-11-01	Erithacus rubecula	K9Z1968		1	74	16.6	0.224324	1	0	0		1
2019-11-01	Parus major	K9Z1969	f	1	73	16.2	0.221918	1	0	0		1
2019-11-01	Parus major	K9Z1970	f	1	71	15.6	0.219718	1	0	0		1
2019-11-01	Parus major	K9Z1971	m	1	76	18	0.236842	1	0	0		0
2019-11-01	Parus major	K9Z1972	f	1	77	17.2	0.223377	1	0	0		0
2019-11-01	Parus major	K9Z1973	f	1	75	17.7	0.236	1	0	0		0
2019-11-01	Parus major	K9Z1974	f	1	73	16.5	0.226027	1	0	0		0
2019-11-01	Parus major	K9Z1975	f	1	73	16.9	0.231507	1	0	0		0
2019-11-01	Parus major	K9Z1976	f	1	76	16.8	0.221053	1	0	0		0
2019-11-01	Parus major	K9Z1977	f	1	72	16.2	0.225	1	0	0		0
2019-11-01	Cyanistes caeruleus	K9Z1978	f	1	64			1		0		1
2019-11-01	Cyanistes caeruleus	K9Z1979	f	1	62	9.6	0.154839	1	0	0		1
2019-11-01	Cyanistes caeruleus	K9Z1980	f	2+	67	10.1	0.150746	2	0	0		0
2019-11-01	Parus major	K9Z1981	m	1	75	16.5	0.22	3	1	1		0
2019-11-01	Parus major	K9Z1982	m	1	74	17.9	0.241892	1	0	0		0
2019-11-01	Cyanistes caeruleus	K9Z1985	f	1	63	10.8	0.171429	1	0	0		1
2019-11-01	Erithacus rubecula	K9Z1986		1	74	15.9	0.214865	1	0	0		0
2019-11-01	Regulus regulus	LK47268	m	1		5.2		1		0		0
2019-11-01	Regulus regulus	LK47276	m	1		5.6		1		0		1
2019-11-01	Regulus regulus	LK47400	m	1	56	5.8	0.103571	1	0	0		0
2019-11-01	Regulus regulus	LK47401	m	1	53	4.9	0.0924528	1	0	0		0
2019-11-01	Regulus regulus	LK47402	m	1	54	6.2	0.114815	1	0	0		1
2019-11-01	Regulus regulus	LK47403	m	1	55	4.9	0.0890909	1	0	0		0
2019-11-01	Regulus regulus	LK47404	m	1	54	5.2	0.0962963	1	0	0		0
2019-11-01	Regulus regulus	LK47405	m	1	53	5.5	0.103774	1	0	0		1
2019-11-01	Regulus regulus	LK47406	m	1	50	5.2	0.104	1	0	0		0
2019-11-01	Regulus regulus	LK47407	m	1	54	5.9	0.109259	1	0	0		0
2019-11-01	Regulus regulus	LK47408	f	1	52	5.3	0.101923	1	0	0		0
2019-11-01	Regulus regulus	LK47409	f	1	50	5.1	0.102	1	0	0		0
2019-11-01	Regulus regulus	LK47410	m	1	55	5.9	0.107273	1	0	0		1
2019-11-01	Phylloscopus collybita	LK47411		1	54	6	0.111111	1	0	0		0
2019-11-01	Regulus regulus	LK47412	m	1	56	5.3	0.0946429	1	0	0		0
2019-11-01	Regulus regulus	LK47413	m	1	54	5.5	0.101852	1	0	0		0
2019-11-01	Regulus regulus	LK47414	f	2+	50	5.6	0.112	2	0	0		1
2019-11-01	Regulus regulus	LK47415	m	1	56	5.4	0.0964286	1	0	0		0
2019-11-01	Aegithalos caudatus	LK47422		1	67	8.1	0.120896	1	0	0		0
2019-11-01	Aegithalos caudatus	LK47424		1	64	8	0.125	1	0	0		0
2019-11-01	Aegithalos caudatus	LK47425		1	61	7.9	0.129508	1	0	0		0
2019-11-01	Regulus regulus	LK47436	m	1	54	5.2	0.0962963	1	0	0		0
2019-11-01	Aegithalos caudatus	LK47439		1	64	8	0.125	1	0	0		1
2019-11-01	Aegithalos caudatus	VC29257		1	65	8.8	0.135385	1	0	0		0
2019-11-02	Turdus merula	HJ16644	f	1		85.5		1		0		0
2019-11-02	Turdus merula	HJ16705	f	1		88.4		1		0		0
2019-11-02	Turdus merula	HJ16761	m	1	132	88.2	0.668182	1	0	0		1
2019-11-02	Turdus merula	HJ16762	f	1	126	95.1	0.754762	1	0	0		0
2019-11-02	Turdus merula	HJ16763	f	1		95.2		1		0		1
2019-11-02	Turdus merula	HJ16764	m	1	132	89	0.674242	1	0	0		0
2019-11-02	Turdus merula	HJ16765	f	1		84.8		1		0		1
2019-11-02	Turdus merula	HJ16766	m	1		85.7		1		0		0
2019-11-02	Turdus merula	HJ16767	f	1	127	83.9	0.66063	1	0	0		0
2019-11-02	Turdus merula	HJ16768	m	1	134	95.9	0.715672	1	0	0		0
2019-11-02	Turdus merula	HJ16771	f	1	128	96.2	0.751563	1	0	0		0
2019-11-02	Turdus merula	HJ16772	f	1	126	91.5	0.72619	1	0	0		0
2019-11-02	Turdus merula	HJ16773	m	1	131	86.3	0.658779	1	0	0		0
2019-11-02	Turdus merula	HJ16774	f	1	121	90.4	0.747107	1	0	0		0
2019-11-02	Turdus merula	HJ16775	f	1	128	83.1	0.649219	1	0	0		0
2019-11-02	Turdus merula	HJ16776	f	1	127	92.6	0.729134	1	0	0		0
2019-11-02	Turdus merula	HJ16777	f	2+	127	108.4	0.853543	2	0	0		0
2019-11-02	Turdus merula	HJ16778	m	2+		95.5		2		0		0
2019-11-02	Erithacus rubecula	K7T4728		2+	74	17.7	0.239189	3	1	1		0
2019-11-02	Cyanistes caeruleus	K7T7668		1		11.2		1		0		0
2019-11-02	Parus major	K9Z0783	m	1		18.2		1		0		0
2019-11-02	Erithacus rubecula	K9Z1961		1		15.6		1		0		1
2019-11-02	Erithacus rubecula	K9Z1965		1		16.9		1		0		1
2019-11-02	Erithacus rubecula	K9Z1968		1		15.9		1		0		0
2019-11-02	Erithacus rubecula	K9Z1987		1	72	16.9	0.234722	1	0	0		1
2019-11-02	Erithacus rubecula	K9Z1988		1	71	16.3	0.229577	1	0	0		0
2019-11-02	Erithacus rubecula	K9Z1989		1	71	15.8	0.222535	1	0	0		1
2019-11-02	Erithacus rubecula	K9Z1990	f	1	70	16.1	0.23	1	0	0		0
2019-11-02	Erithacus rubecula	K9Z1991		1	74	15.6	0.210811	1	0	0		0
2019-11-02	Certhia familiaris	LK42789		1	64	9	0.140625	1	0	0		0
2019-11-02	Troglodytes troglodytes	LK46047		1		10.4		1		0		0
2019-11-02	Regulus regulus	LK47131	f	1		5.7		1		0		0
2019-11-02	Regulus regulus	LK47444	m	1	54	5.8	0.107407	1	0	0		0
2019-11-02	Regulus regulus	LK47445	m	1	54	5.6	0.103704	1	0	0		1
2019-11-02	Regulus regulus	LK47446	m	1	54	5.6	0.103704	1	0	0		1
2019-11-02	Regulus regulus	LK47447	f	1	51	5	0.0980392	1	0	0		0
2019-11-02	Regulus regulus	LK47448	m	1	56	5.9	0.105357	1	0	0		0
2019-11-02	Regulus regulus	LK47449	m	1	55	5.8	0.105455	1	0	0		0
2019-11-02	Regulus regulus	LK47450	f	1	51	5.8	0.113725	1	0	0		0
2019-11-02	Regulus regulus	LK47451	m	2+	53	5.1	0.0962264	2	0	0		1
2019-11-02	Regulus regulus	LK47452	f	2+	52	5.2	0.1	2	0	0		0
2019-11-02	Regulus regulus	LK47454	m	2+	53	5.4	0.101887	2	0	0		1
2019-11-02	Regulus regulus	LK47455	m	1	54	5.5	0.101852	1	0	0		1
2019-11-02	Regulus regulus	LK47456	f	1	50	5.4	0.108	1	0	0		1
2019-11-02	Regulus regulus	LK47457	f	1	52	5.2	0.1	1	0	0		0
2019-11-02	Regulus regulus	LK47458	m	1	53	5.2	0.0981132	1	0	0		0
2019-11-02	Aegithalos caudatus	LK47460		1	64	8.8	0.1375	1	0	0		0
2019-11-02	Aegithalos caudatus	LK47463		1	65	8.4	0.129231	1	0	0		0
2019-11-02	Troglodytes troglodytes	LK47466		1	47	9.2	0.195745	1	0	0		0
2019-11-02	Regulus regulus	LK47467	m	1	54	5.5	0.101852	1	0	0		0
2019-11-02	Troglodytes troglodytes	LK47469		1	50	10.5	0.21	1	0	0		0
2019-11-03	Turdus merula	HJ01955	m	1	129	98	0.75969	1	0	0		0
2019-11-03	Turdus merula	HJ16571	f	1	129	93.7	0.726357	1	0	0		0
2019-11-03	Turdus merula	HJ16768	m	1		93.3		1		0		0
2019-11-03	Turdus merula	HJ16779	m	2+	135	88.4	0.654815	2	0	0		1
2019-11-03	Parus major	K3N8754	f	2+	78	17.3	0.221795	2	0	0		1
2019-11-03	Erithacus rubecula	K7T4728		2+		18.4		3		1		0
2019-11-03	Cyanistes caeruleus	K7T7906		1		10.9		1		0		1
2019-11-03	Erithacus rubecula	K9Z1988		1		15.5		1		0		1
2019-11-03	Erithacus rubecula	K9Z1992		1	73	15.8	0.216438	1	0	0		0
2019-11-03	Erithacus rubecula	K9Z1993		1	74	15.5	0.209459	1	0	0		0
2019-11-03	Parus major	K9Z1994	f	2+	73	17.6	0.241096	2	0	0		1
2019-11-03	Parus major	K9Z1995	m	1	75	17.6	0.234667	1	0	0		1
2019-11-03	Parus major	K9Z1996	m	1	76	17.4	0.228947	1	0	0		0
2019-11-03	Parus major	K9Z1997	m	1	78	17.2	0.220513	3	1	1		0
2019-11-03	Parus major	K9Z1998	f	2+	75	16.6	0.221333	2	0	0		0
2019-11-03	Parus major	K9Z1999	f	1	75	16.7	0.222667	1	0	0		0
2019-11-03	Cyanistes caeruleus	K9Z2000	f	1	62	10.4	0.167742	1	0	0		1
2019-11-03	Cyanistes caeruleus	K9Z2001	f	2+	65	11.2	0.172308	2	0	0		1
2019-11-03	Erithacus rubecula	K9Z2002		1	73	17.8	0.243836	1	0	0		1
2019-11-03	Troglodytes troglodytes	LK40407		1		10.2		1		0		0
2019-11-03	Regulus regulus	LK47406	m	1		5.2		1		0		0
2019-11-03	Regulus regulus	LK47457	f	1		4.8		1		0		0
2019-11-03	Troglodytes troglodytes	LK47470		2+	45	8.2	0.182222	3	1	1		0
2019-11-03	Regulus regulus	LK47471	m	2+	53	5.4	0.101887	2	0	0		1
2019-11-03	Regulus regulus	LK47472	m	1	54	5.4	0.1	1	0	0		0
2019-11-03	Regulus regulus	LK47473	f	1	51	5.6	0.109804	1	0	0		0
2019-11-03	Regulus regulus	LK47474	f	1	52	5.4	0.103846	1	0	0		1
2019-11-03	Regulus regulus	LK47475	m	2+	54	5.5	0.101852	2	0	0		0
2019-11-03	Regulus regulus	LK47476	f	1	51	5.6	0.109804	1	0	0		0
2019-11-03	Regulus regulus	LK47477	f	1	53	5	0.0943396	1	0	0		0
2019-11-03	Regulus regulus	LK47478	f	1	53	5	0.0943396	1	0	0		0
2019-11-03	Regulus regulus	LK47479	m	2+	55	5.6	0.101818	2	0	0		1
2019-11-04	Turdus merula	HJ16747	f	1		86.2		1		0		1
2019-11-04	Turdus merula	HJ16780	m	2+	134	94.5	0.705224	2	0	0		0
2019-11-04	Turdus merula	HJ16781	f	1	128	90.2	0.704688	1	0	0		0
2019-11-04	Turdus merula	HJ16782	f	1	127	91.5	0.720472	1	0	0		0
2019-11-04	Turdus merula	HJ16783	f	1	127	96.4	0.759055	1	0	0		0
2019-11-04	Turdus merula	HJ16784	m	1	137	106.2	0.775182	1	0	0		0
2019-11-04	Erithacus rubecula	K9Z1880		1		15.3		1		0		0
2019-11-04	Erithacus rubecula	K9Z1945		2+		17.3		2		0		1
2019-11-04	Erithacus rubecula	K9Z1953		1		15.6		1		0		0
2019-11-04	Erithacus rubecula	K9Z1964		1		16.5		1		0		0
2019-11-04	Erithacus rubecula	K9Z1988		1		15		1		0		0
2019-11-04	Erithacus rubecula	K9Z2003	m	1	75	16.1	0.214667	1	0	0		0
2019-11-04	Erithacus rubecula	K9Z2005	f	1	69	16.9	0.244928	1	0	0		0
2019-11-04	Erithacus rubecula	K9Z2006		1	74	17.9	0.241892	1	0	0		1
2019-11-04	Erithacus rubecula	K9Z2007		1	71	14.5	0.204225	1	0	0		0
2019-11-04	Erithacus rubecula	K9Z2008		1	73	15.6	0.213699	1	0	0		0
2019-11-04	Erithacus rubecula	K9Z2009		1	71	16.8	0.23662	1	0	0		0
2019-11-04	Erithacus rubecula	K9Z2010		1	74	16.8	0.227027	1	0	0		0
2019-11-04	Cyanistes caeruleus	K9Z2011	f	1	63	10.7	0.169841	3	1	1		1
2019-11-04	Erithacus rubecula	K9Z2012	f	2+	70	13.8	0.197143	2	0	0		0
2019-11-04	Certhia familiaris	LK46604		1		9		1		0		0
2019-11-04	Regulus regulus	LK47457	f	1		4.8		1		0		0
2019-11-04	Regulus regulus	LK47472	m	1		6		1		0		0
2019-11-04	Regulus regulus	LK47479	m	2+		5.2		2		0		0
2019-11-04	Troglodytes troglodytes	LK47480		1	49	8.7	0.177551	1	0	0		0
2019-11-04	Troglodytes troglodytes	LK47481		1	51	10.5	0.205882	1	0	0		0
2019-11-04	Regulus regulus	LK47482	m	1	53	5	0.0943396	1	0	0		0
2019-11-04	Regulus regulus	LK47483	m	1	54	5.2	0.0962963	1	0	0		0
2019-11-04	Regulus regulus	LK47484	m	1	54	5.6	0.103704	1	0	0		0
2019-11-04	Regulus regulus	LK47485	f	1	52	5.2	0.1	1	0	0		0
2019-11-04	Regulus regulus	LK47486	m	1	56	5.7	0.101786	1	0	0		0
2019-11-04	Regulus regulus	LK47487	m	1	53	5.6	0.10566	1	0	0		0
2019-11-04	Troglodytes troglodytes	LK47488		1	47	9.9	0.210638	1	0	0		0
2019-11-04	Troglodytes troglodytes	LK47489		1	51	9.7	0.190196	1	0	0		0
2019-11-05	Turdus merula	HJ16783	f	1		88.8		1		0		0
2019-11-05	Turdus merula	HJ16785	m	2+	134	95.2	0.710448	2	0	0		0
2019-11-05	Turdus merula	HJ16786	m	2+	135	103.1	0.763704	2	0	0		0
2019-11-05	Erithacus rubecula	K9Z1881		1		14.7		1		0		0
2019-11-05	Erithacus rubecula	K9Z1953		1		15.4		1		0		0
2019-11-05	Erithacus rubecula	K9Z2008		1		14.3		1		0		0
2019-11-05	Erithacus rubecula	K9Z2013		1		18.4		1		0		0
2019-11-05	Erithacus rubecula	K9Z2014		2+	74	14.6	0.197297	3	1	1		0
2019-11-05	Erithacus rubecula	K9Z2015		2+	75	15.6	0.208	3	1	1		0
2019-11-05	Erithacus rubecula	K9Z2016		1	74	15.6	0.210811	1	0	0		0
2019-11-05	Erithacus rubecula	K9Z2019	f	1	70	16.1	0.23	1	0	0		0
2019-11-05	Erithacus rubecula	K9Z2020		2+	73	16.2	0.221918	2	0	0		0
2019-11-05	Regulus regulus	LK47472	m	1		6		1		0		0
2019-11-05	Regulus regulus	LK47473	f	1		6.9		1		0		0
2019-11-05	Regulus regulus	LK47484	m	1		6.1		1		0		0
2019-11-05	Regulus regulus	LK47487	m	1		6.2		1		0		0
2019-11-05	Troglodytes troglodytes	LK47490		1	48	9.2	0.191667	1	0	0		0
2019-11-05	Regulus regulus	LK47491	f	1	52	5.1	0.0980769	1	0	0		0
2019-11-05	Troglodytes troglodytes	LK47492		1	45	9.9	0.22	1	0	0		0
2019-11-05	Regulus regulus	LK47493	m	1	54	5.5	0.101852	1	0	0		0
2019-11-05	Aegithalos caudatus	LK47494		1	63	8.2	0.130159	1	0	0		0
2019-11-05	Aegithalos caudatus	LK47496		1	66	8.1	0.122727	1	0	0		0
2019-11-05	Aegithalos caudatus	LK47497		1	66	8.6	0.130303	1	0	0		0
2019-11-05	Regulus regulus	LK47500	m	1	55	5.5	0.1	1	0	0		0
2019-11-05	Regulus regulus	LK47501	m	1	54	5.4	0.1	1	0	0		0
2019-11-05	Regulus regulus	LK47502	f	1	51	5.6	0.109804	1	0	0		0
2019-11-05	Regulus regulus	LK47503	f	2+	50	6	0.12	2	0	0		0
2019-11-05	Regulus regulus	LK47504	m	1	56	6.4	0.114286	1	0	0		0
2019-11-05	Regulus regulus	LK47505	m	1	54	6	0.111111	1	0	0		0
2019-11-05	Regulus regulus	LK47506	m	1	55	5.9	0.107273	1	0	0		0
2019-11-05	Regulus regulus	LK47507	m	1	56	5.8	0.103571	1	0	0		0
2019-11-05	Regulus regulus	LK47508	m	1	54	5.9	0.109259	1	0	0		0
2019-11-05	Troglodytes troglodytes	LK47509		1	49	10.9	0.222449	1	0	0		0
2019-11-05	Troglodytes troglodytes	LK47510		1	50	10.9	0.218	1	0	0		0
2019-11-06	Turdus merula	HJ16739	f	1		83.2		1		0		0
2019-11-06	Turdus merula	HJ16787	m	2+	130	89.1	0.685385	2	0	0		0
2019-11-06	Turdus merula	HJ16788	f	1	132	96.6	0.731818	1	0	0		0
2019-11-06	Parus major	K7T4715	f	2+	74	16.4	0.221622	2	0	0		0
2019-11-06	Cyanistes caeruleus	K7T7814	f	1	64	10.1	0.157812	1	0	0		1
2019-11-06	Erithacus rubecula	K9Z1990		1		15.6		1		0		0
2019-11-06	Erithacus rubecula	K9Z2021	f	1	70	17.6	0.251429	1	0	0		0
2019-11-06	Erithacus rubecula	K9Z2022	f	1	70	15.7	0.224286	1	0	0		0
2019-11-06	Erithacus rubecula	K9Z2023	f	2+	69	15.8	0.228986	2	0	0		0
2019-11-06	Erithacus rubecula	K9Z2024	f	1	68	14.6	0.214706	1	0	0		1
2019-11-06	Erithacus rubecula	K9Z2025	m	1	75	19.1	0.254667	1	0	0		0
2019-11-06	Erithacus rubecula	K9Z2026	f	1	70	17.4	0.248571	1	0	0		0
2019-11-06	Erithacus rubecula	K9Z2027	f	1	70	18.2	0.26	1	0	0		0
2019-11-06	Erithacus rubecula	K9Z2028		1	73	16	0.219178	1	0	0		0
2019-11-06	Erithacus rubecula	K9Z2029		1	74	18	0.243243	1	0	0		0
2019-11-06	Erithacus rubecula	K9Z2030		1	73	16.3	0.223288	1	0	0		0
2019-11-06	Troglodytes troglodytes	LK46787		1		9.5		1		0		0
2019-11-06	Regulus regulus	LK47505	m	1		5.5		1		0		0
2019-11-06	Troglodytes troglodytes	LK47511		1	48	9.4	0.195833	1	0	0		0
2019-11-06	Troglodytes troglodytes	LK47512		1	47	8.2	0.174468	1	0	0		0
2019-11-06	Troglodytes troglodytes	LK47513		1	49	9.3	0.189796	1	0	0		0
2019-11-06	Regulus regulus	LK47514	f	2+	53	5.7	0.107547	2	0	0		0
2019-11-06	Regulus regulus	LK47515	m	1	53	6.4	0.120755	1	0	0		0
2019-11-06	Regulus regulus	LK47516	m	1	54	5.3	0.0981481	1	0	0		0

## Sheet: info
date	Date
spec	Species
ring-id	Ring number
sex	Sex
age	Age (cy)
wing	Wing length (mm)
mass	Mass (g)
bmi	BMI (body mass index, for detailes see Materials & Methods)
colour	Colour of iris (classes 1-3, see Materials & Methods in the manuscript)
iris_ident	Compliance (0 = compliant, 1 = non-compliant); the classes of iris were coded as follows: class 1 (grey) iris of immatures = 1, class 2 (brown) iris of adults = 1, class 3 (intermediate) iris of immatures = 0, class 3 (intermediate) iris of adults = 0
iris_ident_all	Compliance all cases (0 = compliant, 1 = non-compliant); the classes of iris were coded as follows: class 1 (grey) iris of immatures = 1, class 2 (brown) iris of adults = 1, class 3 (intermediate) iris of immatures = 0, class 3 (intermediate) iris of adults = 0
non-compliant	Non-compliant
seq	Age identification sequence (1 = aged based on iris first , 0 = aged by other trait first and the by the iris)
